# Supplementary material
Source: PubMed Central journal article supplement (PMC3593151)
Supplement: neo1503_0281SD1.pdf [file neo1503_0281SD1.pdf]

**Table W1.** List of Antibodies.

| Antibody          | Supplier                                       | Antibody                  | Supplier                        |
|-------------------|------------------------------------------------|---------------------------|---------------------------------|
| $\alpha 6\beta 4$ | Clone B5.5 [1]                                 | EpCAM                     | Clone D5.7 [1]                  |
| ADAM10            | Santa Cruz Biotechnology (Heidelberg, Germany) | Fibulin                   | Santa Cruz Biotechnology        |
| ADAM17            | Santa Cruz Biotechnology                       | Fibronectin               | BD (Heidelberg, Germany)        |
| ADAMTS1           | Santa Cruz Biotechnology                       | Follistatin               | Santa Cruz Biotechnology        |
| ADAMTS5           | Santa Cruz Biotechnology                       | GADD45G                   | Santa Cruz Biotechnology        |
| ADAMTS8           | Santa Cruz Biotechnology                       | Gal.bind. 4               | Santa Cruz Biotechnology        |
| ALDH3a1           | Santa Cruz Biotechnology                       | Hyaluronan                | Rockland (Gilbertsville, PA)    |
| Anillin           | Santa Cruz Biotechnology                       | HGF                       | Santa Cruz Biotechnology        |
| bFGF              | Oncogene (Boston, MA)                          | HGDF                      | Santa Cruz Biotechnology        |
| BTG2              | Santa Cruz Biotechnology                       | IGF                       | Santa Cruz Biotechnology        |
| CA5B              | Santa Cruz Biotechnology                       | IL1R1                     | Santa Cruz Biotechnology        |
| C4.4A             | Clone C4.4 [1]                                 | Laminin 1                 | Rockland                        |
| Caveolin          | Santa Cruz Biotechnology                       | MAL                       | Santa Cruz Biotechnology        |
| CD9               | BD                                             | MDR1                      | Santa Cruz Biotechnology        |
| CD11a             | BD                                             | MMP2                      | Dianova (Hamburg, Germany)      |
| CD11b             | Clone Ox42 (EAACC)*                            | MMP3                      | Santa Cruz Biotechnology        |
| CD11c             | Clone Ox41 (EAACC)*                            | MMP9                      | Dianova                         |
| CD18              | BD                                             | MMP13                     | Dianova                         |
| CD24              | BD                                             | MMP14                     | Dianova                         |
| CD29              | BD                                             | Metallothio.              | Santa Cruz Biotechnology        |
| CD44s             | Clone Ox50 (EAACC)*                            | Neuropilin                | Santa Cruz Biotechnology        |
| CD44v6            | Clone A2.6 [1]                                 | Osteopontin               | Santa Cruz Biotechnology        |
| CD49a             | BD                                             | Palladin                  | Santa Cruz Biotechnology        |
| CD49b             | BD                                             | Pan cadherin              | Santa Cruz Biotechnology        |
| CD49c             | BD                                             | PDGF                      | BD                              |
| CD49d             | BD                                             | PDGFR                     | BD                              |
| CD49e             | BD                                             | Periostin                 | Santa Cruz Biotechnology        |
| CD49f             | Abcam (Cambridge, United Kingdom)              | PG-Synth. 3               | Santa Cruz Biotechnology        |
| CD53              | Clone Ox44 (EAACC)*                            | Phospholip.A2             | Santa Cruz Biotechnology        |
| CD54              | Biozol (Eching, Germany)                       | Properdin                 | Santa Cruz Biotechnology        |
| CD56              | BD                                             | SDF1                      | Abcam                           |
| CD61              | Biozol                                         | SLPI                      | Santa Cruz Biotechnology        |
| CD62L             | BD                                             | SOD2                      | Santa Cruz Biotechnology        |
| CD63              | BD                                             | Tenascin                  | LabVision (Fremont, CA)         |
| CD81              | Santa Cruz Biotechnology                       | TF                        | Santa Cruz Biotechnology        |
| CD104             | BD                                             | TGF $\beta$               | Santa Cruz Biotechnology        |
| CD106             | Biozol                                         | TRAF4                     | Santa Cruz Biotechnology        |
| CD151             | [2]                                            | uPA                       | Calbiochem (Darmstadt, Germany) |
| Cdc2a             | Santa Cruz Biotechnology                       | uPAR                      | Calbiochem                      |
| Claudin-4         | Santa Cruz Biotechnology                       | VEGF                      | Biotrend (Köln, Germany)        |
| Claudin-6         | Santa Cruz Biotechnology                       | VEGFR1                    | Biotrend                        |
| Collagen I        | Rockland                                       | VEGFR2                    | Biotrend                        |
| Collagen II       | LabVision                                      | Vitronectin               | Biotrend                        |
| Collagen IV       | Rockland                                       | vWF                       | Abcam                           |
| CXCR4             | Santa Cruz Biotechnology                       | mIgG <sup>†</sup>         | Dianova                         |
| CyclinB2          | Santa Cruz Biotechnology                       | mIgM <sup>†</sup>         | Dianova                         |
| D6.1A             | Clone D6.1 [1]                                 | Rabbit IgG <sup>†</sup>   | Dianova                         |
| Endothelin        | BD                                             | Goat IgG <sup>†</sup>     | Dianova                         |
|                   |                                                | Streptavidin <sup>†</sup> | Dianova                         |

References:

[1] Martzku S, Wenzel A, Liu S, and Zöller M (1989). Antigenic differences between metastatic and non-metastatic rat tumor variants characterized by monoclonal antibodies. *Cancer Res* **49**, 1294–1299.

[2] Claas C, Wahl J, Orlicky D, Karaduman H, Schnölzer M, Kempf T, and Zöller M (2005). The tetraspanin D6.1A and its molecular partners on rat carcinoma cells. *Biochem J* **389**, 99–110.

\*EAACC, European Association of Animal Cell Cultures, Porton Down, United Kingdom.

<sup>†</sup>Secondary antibodies and streptavidin were fluorescein isothiocyanate, phycoerythrin (PE), biotin, or HRP labeled.

Table W2. Primers.

---

**Primers for qRT-PCR**

**GAPDH**

Forward primer: cttctccatggtggtgaagac

Reverse primer: gacccttcattgacctcaac

**Cdh17**

Forward primer: cctgggtctctgtgaagg

Reverse primer: gtgattttgatgggtgagg

**MAL**

Forward primer: ttctccgtctctgcacctt

Reverse primer: gtctccccaccatgagtacc

**KLF4**

Forward primer: gcaagtcctctctccatt

Reverse primer: ggtaaggtttctgcctgtg

**MMP3**

Forward primer: ggctgaagatgacaggaag

Reverse primer: caatggcagaatccacactc

**MT1a**

Forward primer: accccaactgctctgct

Reverse primer: actgtccgagccactt

**ADAMTS1**

Forward primer: gccactgcttctactctgg

Reverse primer: gtgcgattgactcctcttc

**TRAF4**

Forward primer: gctgctggaggctgcaa

Reverse primer: atctgtctgggtctctg

**4.5SRNA**

Forward primer: aatgccccaaaacagtcaa

Reverse primer: acctccagttgaaccagcac

**C4.4A**

Forward primer: attcactcagcggttct

Reverse primer: gtggtggcttgatgtag

**Stem loop primers**

Universal reverse miRNA primer: 5' gtcagggtccgaggt 3'

**Stem loop miR-300-5p:**

Forward primer: 5' gttgctctggtgcagggtccgaggtattcgaccagagccaacacaag 3'

**Stem loop miR-296:**

Forward primer: 5' gttgctctggtgcagggtccgaggtattcgaccagagccaacggagag 3'

**Stem loop miR-300-5p:**

Forward primer: 5' gtttggttgaagagaggttacc 3'

**Stem loop miR-296:**

Forward primer: 5' ttggagggttgggtggag 3'

**Oligos and primers for the reporter assay**

**300-5p binding oligo**

Sense: 5' aaactagcggccgctagtacaaggataacctcttcaat 3'

Antisense: 5' ctgattgaagagaggttacctttagctagcggccgctagttt 3'

**Cdh17**

3'UTR cdh17 fw Pme1: gtttaactcccttctgtttccacctg

3'UTR cdh17 rev Xba1: tctagaccacgtacatcttctg

**MAL**

3'UTR MAL fw Pme1: gtttaaacacagcagattggagct

3'UTR MAL rev Xba1: tctagatggtgggtgaatttcagtg

**Sequences of the 3'UTR with binding sites and SVR score**

**3'UTR MAL**

**gacagcagattggagc**tgaaccagagcaattaactggtcagcctgctctcccattacttctggaacagactgaatggaggagaaaagaaa  
caagccaaaagaaaacaaacagacacaaaaaaaagaaacatgtrtcgagctcttgggtgttacgtttaccttctgtagggttttagggttg  
ctgaatttaacttccagcaaaaggagaaagagttgcttggcggcccttctgccccttgaccaggaacaggggtgggagcttggaaacctgac  
tgaagaatgacaatttcccttgacccttggagcaggtcctaacaattgcttgggaattttccacaagctctttgaccactatccccggcata  
tcttagattttggatagcttaggtgacagggcactgaaattcaccaca

**gacagcagattggagc**: target site miR-494 (mirSVR score: -0.9472)

**3'UTR Cdh17**

tcccttctggttccacctgcccctgattctcagcattac**attaattt**aaatg**gtgcaca**caaaagacaaagtgaagtcttgggggggtgtt  
gctaagtgacagcctattcttttagacacaaacagcttctctggtgtgtcatcttaatagaggtctccagcttggctatggtgtagacctggg  
gaggtacaatacaactccgtrttcaagaagacctactctatgaggcacaggaactgacgagctgctgggtttactcactactccgtgctta  
**catcatgctgtacatgtttt**ttgtatattgaagttttgtatatttatcatgtggaggaagacgaaagcatgtacgtgggtg

**attaattt**aaatg**gtgcaca**: target site miR-542-3P (mirSVR score: -0.1085)

**atacatgctgtacatgtttt**a: target site miR 494 (mirSVR score: -0.1085)

---

**Table W3.** mRNA Recovery in ASML<sup>wt</sup> and ASML-CD44<sup>kd</sup> Exosomes (Signal Strength 10,000).

| mRNA                                                                                                       | Mean Signal Strength*       |                                  |
|------------------------------------------------------------------------------------------------------------|-----------------------------|----------------------------------|
|                                                                                                            | ASML <sup>wt</sup> Exosomes | ASML-CD44 <sup>kd</sup> Exosomes |
| Acidic ribosomal phosphoprotein P0 (Arbp)                                                                  | 36,537                      | 34,209                           |
| Pred. similar to LRRG00135                                                                                 | 28,102                      | 17,532                           |
| Pred. similar to Ab2-143                                                                                   | 26,757                      | 13,956                           |
| Pred. similar to 60S ribosomal protein L37a                                                                | 25,511                      | 27,156                           |
| Pred. similar to LRRG00135                                                                                 | 25,318                      | 15,450                           |
| Pred. similar to restin (LOC503278)                                                                        | 24,223                      | 12,457 <sup>†</sup>              |
| Pred. similar to RIKEN cDNA 2410116I05                                                                     | 23,944                      | 21,405                           |
| Ribosomal protein S15a (Rps15a)                                                                            | 22,854                      | 25,011                           |
| Pred. ribosomal protein L27a (Rpl27a)                                                                      | 21,294                      | 25,079                           |
| Pred. ribosomal protein L37a (Rpl37a)                                                                      | 20,655                      | 26,661                           |
| Pred. similar to 60S ribosomal protein L7a                                                                 | 18,819                      | 24,078                           |
| Ribosomal protein S14 (Rps14)                                                                              | 18,335                      | 22,643                           |
| Eukaryotic translation elongation factor 1 alpha 1                                                         | 17,840                      | 20,172                           |
| Pred. similar to ORF4                                                                                      | 17,709                      | 8,172 <sup>†</sup>               |
| Pred. similar to 60S ribosomal protein L23a                                                                | 17,248                      | 22,830                           |
| Pred. similar to ribosomal protein L19                                                                     | 16,799                      | 21,770                           |
| Pred. similar to ORF4 (LOC361942)                                                                          | 16,503                      | 7,596 <sup>†</sup>               |
| Ribosomal protein S18 (Rps18)                                                                              | 16,501                      | 16,624                           |
| Pred. similar to testis-derived transcript                                                                 | 16,125                      | 25,111                           |
| Pred. ribosomal protein L10 (Rpl10)                                                                        | 16,056                      | 14,972                           |
| Ribosomal protein L41 (Rpl41)                                                                              | 15,816                      | 15,564                           |
| Pred. S100 calcium-binding protein A11 (S100a11)                                                           | 15,812                      | 20,179                           |
| Pred. similar to 40S ribosomal protein S3                                                                  | 15,623                      | 14,168                           |
| Ribosomal protein S4, X-linked (Rps4x)                                                                     | 15,608                      | 22,525                           |
| Pred. ribosomal protein s25 (Rps25)                                                                        | 15,597                      | 15,107                           |
| Pred. similar to Ac1262                                                                                    | 15,361                      | 6,541 <sup>†</sup>               |
| Ribosomal protein L9 (Rpl9)                                                                                | 15,328                      | 15,018                           |
| Tumor protein, translationally controlled 1 (Tpt1)                                                         | 14,796                      | 15,898                           |
| Pred. similar to 60S ribosomal protein L7a                                                                 | 14,785                      | 18,844                           |
| Ferritin, heavy polypeptide 1 (Fth1)                                                                       | 14,268                      | 13,168                           |
| Ribosomal protein L29 (Rpl29)                                                                              | 14,249                      | 19,063                           |
| Eukaryotic translation elongation factor 1 alpha 1                                                         | 14,047                      | 15,670                           |
| Pred. ribosomal protein S5 (Rps5)                                                                          | 13,772                      | 12,954                           |
| Ribosomal protein L3 (Rpl3)                                                                                | 13,516                      | 17,927                           |
| Laminin receptor 1 (ribosomal protein SA) (Lamr1)                                                          | 13,281                      | 16,180                           |
| Ribosomal protein S3 (Rps3)                                                                                | 13,274                      | 13,387                           |
| Ribosomal protein L32 (Rpl32)                                                                              | 13,223                      | 14,601                           |
| Ribosomal protein L6 (Rpl6)                                                                                | 13,023                      | 13,800                           |
| Pred. similar to glyceraldehyde-3-phosphate dehydrogenase                                                  | 12,883                      | 20,653                           |
| Ribosomal protein S10 (Rps10)                                                                              | 12,629                      | 15,551                           |
| Ribosomal protein S29 (Rps29)                                                                              | 12,375                      | 14,993                           |
| Ribosomal protein S20 (Rps20)                                                                              | 12,191                      | 16,162                           |
| Pred. Similar to 60S ribosomal protein L9                                                                  | 12,045                      | 11,228                           |
| Pred. similar to 60S ribosomal protein L6 (neoplasm-related protein C140)                                  | 12,002                      | 11,535                           |
| Pred. similar to ribosomal protein S7                                                                      | 11,952                      | 16,878                           |
| Pred. similar to 40S ribosomal protein S20                                                                 | 11,767                      | 13,423                           |
| Pred. similar to ribosomal protein S23                                                                     | 11,758                      | 14,377                           |
| Pred. similar to ribosomal protein S26                                                                     | 11,619                      | 11,565                           |
| Ribosomal protein L17 (Rpl17)                                                                              | 11,387                      | 14,337                           |
| Pred. similar to ribosomal protein L15                                                                     | 11,382                      | 10,145                           |
| Ubiquitin A-52 residue ribosomal protein fusion product 1                                                  | 11,277                      | 10,050                           |
| Pred. similar to Finkel-Biskis-Reilly murine sarcoma virus (FBR-MuSV) ubiquitously expressed (fox derived) | 11,094                      | 13,392                           |
| Ribosomal protein S8 (Rps8)                                                                                | 11,085                      | 17,872                           |
| Ribosomal protein L22 (Rpl22)                                                                              | 11,074                      | 15,648                           |
| Pred. similar to ribosomal protein L31                                                                     | 11,007                      | 12,825                           |
| Pred. similar to 60S ribosomal protein L32                                                                 | 10,602                      | 12,524                           |
| Ribosomal protein, large, P1 (Rplp1)                                                                       | 10,529                      | 9,656                            |
| Ribosomal protein S26 (Rps26)                                                                              | 10,390                      | 11,011                           |
| Peptidylprolyl isomerase A (Ppia)                                                                          | 10,363                      | 18,435                           |
| Ribosomal protein L27 (Rpl27)                                                                              | 10,242                      | 14,789                           |
| Pred. Finkel-Biskis-Reilly murine sarcoma virus ubiquitously expressed (Fau)                               | 10,237                      | 13,329                           |
| Pred. similar to 60S ribosomal protein L17 (L23) (amino acid starvation-induced protein) (ASI)             | 10,203                      | 12,418                           |
| Pred. similar to tubulin alpha-2 chain (alpha-tubulin 2)                                                   | 8,769                       | 20,050 <sup>†</sup>              |
| Actin, beta (Actb)                                                                                         | 7,779                       | 14,422                           |
| Ribosomal protein L19 (Rpl19)                                                                              | 9,245                       | 12,973                           |
| Pred. similar to l-lactate dehydrogenase A chain                                                           | 8,749                       | 12,938                           |
| Pred. capping protein (actin filament) muscle Z-line, alpha 2                                              | 9,542                       | 12,599                           |
| Pred. similar to ribosomal protein S12                                                                     | 9,387                       | 12,278                           |
| Pred. similar to 60S acidic ribosomal protein P2                                                           | 8,699                       | 12,266                           |
| Calmodulin 2 (Calm2)                                                                                       | 7,108                       | 12,054                           |
| Pred. similar to 60S ribosomal protein L7a                                                                 | 9,513                       | 12,043                           |
| Ribosomal protein L21 (Rpl21)                                                                              | 8,710                       | 11,910                           |

**Table W3.** (continued)

| mRNA                                                                               | Mean Signal Strength*       |                                  |
|------------------------------------------------------------------------------------|-----------------------------|----------------------------------|
|                                                                                    | ASML <sup>wt</sup> Exosomes | ASML-CD44 <sup>kd</sup> Exosomes |
| Pred. similar to ribosomal protein L21                                             | 9,121                       | 11,850                           |
| Pred. triosephosphate isomerase 1 (Tpi1)                                           | 5,867                       | 11,739 <sup>†</sup>              |
| PAI-1 mRNA-binding protein (Pairbp1)                                               | 5,297                       | 11,647 <sup>†</sup>              |
| Pred. glutathione S-transferase, pi 1 (Gstp1)                                      | 7,189                       | 11,480                           |
| Pred. similar to glyceraldehyde-3-phosphate dehydrogenase                          | 9,042                       | 11,083                           |
| Ribosomal protein S6 (Rps6)                                                        | 8,109                       | 10,953                           |
| Pred. similar to ribosomal protein S19                                             | 7,851                       | 10,950                           |
| Large subunit ribosomal protein L36a (Rpl36a)                                      | 8,625                       | 10,804                           |
| Pred. actin, gamma, cytoplasmic (Actg)                                             | 8,184                       | 10,751                           |
| Similar to 60S ribosomal protein L21                                               | 7,251                       | 10,610                           |
| Pred. similar to 40S ribosomal protein S3a (V-fos transformation effector protein) | 6,252                       | 10,107                           |
| Ornithine decarboxylase antizyme 1 (Oaz1)                                          | 6,971                       | 10,027                           |

\*Mean signal strength was calculated from duplicates, respectively, triplicates, of two independently performed arrays after normalization (Chipster analysis and Agilent annotation). Only exosomal mRNA with a signal strength of >10,000 is shown.

<sup>†</sup>Signal strength with a more than two-fold change between ASML<sup>wt</sup> and ASML-CD44<sup>kd</sup> exosomes.

**Table W4.** mRNA Expression in ASML<sup>wt</sup> and ASML-CD44<sup>kd</sup> Cells (Signal Strength > 50,000).

| mRNA                                                                 | Mean Signal Strength*    |                               |
|----------------------------------------------------------------------|--------------------------|-------------------------------|
|                                                                      | ASML <sup>wt</sup> Cells | ASML-CD44 <sup>kd</sup> Cells |
| Hypothetical protein LOC310926                                       | 299,044                  | 309,590                       |
| Actin, gamma 1 (Actg1)                                               | 296,979                  | 221,969                       |
| Stefin A2 (Stfa2)                                                    | 294,927                  | 329,519                       |
| Ferritin, light polypeptide (Ftl)                                    | 246,290                  | 277,091                       |
| Heat shock protein 8 (Hspa8)                                         | 246,290                  | 143,431                       |
| Finkel-Biskis-Reilly murine sarcoma virus (FBR-MuSV)                 | 223,513                  | 182,812                       |
| Similar to TRAF-binding protein                                      | 217,401                  | 260,333                       |
| Testis-derived transcript (Tes)                                      | 214,408                  | 143,431                       |
| Ferritin light chain 1-like                                          | 209,996                  | 217,401                       |
| Similar to Ac1147                                                    | 205,674                  | 221,969                       |
| Carcinoembryonic antigen-related cell adhesion molecule 9 (Ceacam9)  | 202,842                  | 249,728                       |
| Similar to glyceraldehyde-3-phosphate dehydrogenase                  | 193,235                  | 180,295                       |
| Similar to Rpl7a protein                                             | 193,235                  | 179,050                       |
| Eukaryotic translation elongation factor 1 gamma (Eef1g)             | 168,221                  | 91,406                        |
| Enolase 1 alpha                                                      | 165,905                  | 200,050                       |
| Ferritin heavy polypeptide 1 (Fth1)                                  | 162,491                  | 121,450                       |
| Ubiquitin A-52 residue ribosomal protein fusion product 1 (Uba52)    | 162,491                  | 133,826                       |
| Phosphoglycerate mutase 1 (brain) (Pgam1)                            | 159,147                  | 90,775                        |
| Similar to sex-determination protein homolog Fem1a                   | 158,048                  | 155,872                       |
| Similar to DKFZP434B168 protein                                      | 155,872                  | 134,757                       |
| Peptidylprolyl isomerase A (cyclophilin A) (Ppia)                    | 151,609                  | 182,812                       |
| Coiled-coil-helix-coiled-coil-helix domain containing 2 (Chchd2)     | 150,562                  | 111,757                       |
| Eukaryotic translation elongation factor 1 alpha 1 (Eef1a1)          | 147,464                  | 151,609                       |
| Annexin A2 (Anxa2)                                                   | 145,433                  | 133,826                       |
| Similar to cleavage and polyadenylation factor 73 kDa (CPSF73kDa)    | 142,441                  | 136,638                       |
| Phosphoglycerate kinase 1 (Ppk1)                                     | 136,638                  | 100,721                       |
| Lactate dehydrogenase A (Ldha)                                       | 135,694                  | 95,950                        |
| Similar to glyceraldehyde-3-phosphate dehydrogenase                  | 135,694                  | 118,129                       |
| Annexin A1 (Anxa1)                                                   | 129,267                  | 101,421                       |
| Heat shock protein HSP 90-beta                                       | 125,733                  | 85,878                        |
| Transketolase (Tkt)                                                  | 125,733                  | 107,204                       |
| Capping protein (actin filament) muscle Z-line, alpha 2 (Capza2)     | 122,295                  | 73,732                        |
| Eukaryotic translation initiation factor 2B, subunit 2 beta (Eif2b2) | 120,611                  | 105,728                       |
| Similar to elongation factor 1-alpha 1 (EF-1-alpha-1)                | 117,313                  | 107,950                       |
| Heat shock cognate 71 kDa protein                                    | 115,698                  | 66,451                        |
| Cathepsin D (Ctsd)                                                   | 114,105                  | 153,726                       |
| Similar to peptidylprolyl isomerase A (cyclophilin A)                | 110,985                  | 137,588                       |
| Actin, beta (Actb)                                                   | 106,464                  | 48,645 <sup>†</sup>           |
| Ubiquitin C (Ubc)                                                    | 106,464                  | 146,445                       |
| Tumor protein translationally controlled 1 (Tpr1)                    | 104,273                  | 153,726                       |
| Eukaryotic translation elongation factor 1 beta 2 (Eef1b2)           | 100,721                  | 102,127                       |
| Ubiquitin B (Ubb)                                                    | 97,290                   | 95,950                        |
| Keratin 18 (Krt18)                                                   | 95,950                   | 19,216 <sup>†</sup>           |
| Hypothetical gene supported by AF152002 (LOC290595)                  | 94,629                   | 56,267                        |
| Tubulin beta 4B class IVb (Tubb4b)                                   | 93,976                   | 72,717                        |
| Transmembrane emp24-like trafficking protein 10 (Tmed10)             | 91,406                   | 131,984                       |
| Interferon gamma-induced GTPase (Igtip)                              | 90,775                   | 113,317                       |

Table W4. (continued)

| mRNA                                                                                     | Mean Signal Strength*    |                               |
|------------------------------------------------------------------------------------------|--------------------------|-------------------------------|
|                                                                                          | ASML <sup>wt</sup> Cells | ASML-CD44 <sup>kd</sup> Cells |
| Similar to elongation factor 1-gamma (EF-1-gamma)                                        | 90,775                   | 40,342 <sup>†</sup>           |
| Glutathione S-transferase pi 1 (Gstp1)                                                   | 86,475                   | 53,232                        |
| Heat shock protein 1 (chaperonin 10) (Hspe1)                                             | 86,475                   | 50,360                        |
| Glutathione peroxidase 2 (Gpx2)                                                          | 85,285                   | 13,401 <sup>†</sup>           |
| Nucleophosmin (nucleolar phosphoprotein B23, Numatrin) (Npm1)                            | 84,111                   | 92,682                        |
| RAN member RAS oncogene family (Ran)                                                     | 84,111                   | 69,273                        |
| Progressive external ophthalmoplegia 1 (Peo1)                                            | 81,811                   | 182,812 <sup>†</sup>          |
| Hypothetical protein LOC687872                                                           | 79,024                   | 71,220                        |
| Eukaryotic translation elongation factor 1 delta (Eef1d)                                 | 77,398                   | 60,725                        |
| Poly(A)-binding protein, cytoplasmic 1 (Pabpc1)                                          | 77,398                   | 115,698                       |
| Eukaryotic translation elongation factor 2 (Eef2)                                        | 76,863                   | 38,166 <sup>†</sup>           |
| Guanine nucleotide binding protein beta polypeptide 2 like 1 (Gnb2l1)                    | 76,332                   | 39,512                        |
| Cytochrome c oxidase subunit VIa polypeptide 1 (Cox6a1)                                  | 75,281                   | 139,509                       |
| NADH-ubiquinone oxidoreductase chain 1                                                   | 74,761                   | 209,996 <sup>†</sup>          |
| Cytochrome c oxidase subunit VIIa polypeptide 2 like (Cox7a2l)                           | 73,732                   | 64,634                        |
| Mitogen-activated protein kinase 3 (MAPK3)                                               | 73,732                   | 80,684                        |
| Galactoside-binding soluble 3 (Lgals3)                                                   | 73,223                   | 80,684                        |
| Cytochrome b                                                                             | 72,717                   | 181,549 <sup>†</sup>          |
| Non-metastatic cells 2 protein (NM23B) (Nme2)                                            | 72,717                   | 65,083                        |
| Myosin light polypeptide 6 smooth muscle and non-muscle-like (Myf6)                      | 72,214                   | 105,728                       |
| RT1 class Ia, locus A1 (RT1-A1)                                                          | 71,716                   | 90,775                        |
| Cell division cycle 37 homolog (Cdc37)                                                   | 69,755                   | 46,988                        |
| Glyceraldehyde-3-phosphate dehydrogenase (GAPDH)                                         | 69,755                   | 52,864                        |
| CD24                                                                                     | 69,273                   | 28,725                        |
| Complement component 1q subcomponent binding protein (C1qbp)                             | 69,273                   | 67,847                        |
| Hematological and neurological expressed 1 (Hn1)                                         | 69,273                   | 22,073 <sup>†</sup>           |
| ATP synthase, H <sup>+</sup> transporting, mitochondrial Fo complex C2 (Atp5g2)          | 68,794                   | 53,602                        |
| Phosphoglycerate dehydrogenase (Phgdh)                                                   | 68,319                   | 72,214                        |
| Proteasome subunit beta type 4 (Psmb4)                                                   | 68,319                   | 39,512                        |
| Heat shock protein 90 alpha class B member 1 (Hsp90ab1)                                  | 67,378                   | 44,762                        |
| Ornithine decarboxylase antizyme 1 (Oaz1)                                                | 67,378                   | 62,432                        |
| Similar to glyceraldehyde-3-phosphate dehydrogenase                                      | 67,378                   | 52,864                        |
| ATP synthase, H <sup>+</sup> transporting, mitochondrial Fo complex d (Atp5h)            | 66,913                   | 72,214                        |
| Thymosin beta 4. X-linked (Tmsb4x)                                                       | 66,913                   | 55,109                        |
| High-mobility group nucleosome binding domain 1 (Hmgn1)                                  | 65,992                   | 85,878                        |
| Phosphatidylethanolamine-binding protein 1 (Pebp1)                                       | 65,992                   | 76,332                        |
| Histidine triad nucleotide-binding protein 1 (Hint1)                                     | 65,536                   | 74,761                        |
| Eukaryotic translation initiation factor 3, subunit I (Eif3i)                            | 65,083                   | 59,889                        |
| ATP synthase subunit d                                                                   | 64,634                   | 65,992                        |
| Heat shock protein 1 (chaperonin) (Hspd1)                                                | 64,187                   | 50,360                        |
| Similar to RIKEN cDNA 3100001N19 (LOC306079)                                             | 63,304                   | 54,728                        |
| H6 family homeobox 1 (Hmx1)                                                              | 62,866                   | 59,064                        |
| GNAS complex locus (Gnas), transcript variant 3                                          | 62,432                   | 120,611                       |
| Ly6/Plaur domain containing 3 (Lypd3)                                                    | 62,432                   | 45,703                        |
| ATP synthase, H <sup>+</sup> transporting, mitochondrial Fo complex E (Atp5i)            | 61,573                   | 64,187                        |
| Similar to glyceraldehyde-3-phosphate dehydrogenase (LOC305194)                          | 61,573                   | 47,315                        |
| Prothymosin alpha (Ptma)                                                                 | 59,475                   | 59,889                        |
| Family with sequence similarity 49, member B (Fam49b)                                    | 58,251                   | 49,667                        |
| ADP-ribosylation factor 5 (Arf5)                                                         | 57,449                   | 32,317                        |
| GTPase IMAP family member 9 (Gimap9)                                                     | 57,449                   | 75,805                        |
| Enolase 1alpha (Eno1) transcript variant 2                                               | 57,052                   | 70,728                        |
| Cysteine-rich protein 2 (Crip2)                                                          | 56,658                   | 42,055                        |
| ATP synthase, H <sup>+</sup> transporting, F1 complex $\alpha$ 1 cardiac muscle (Atp5a1) | 55,878                   | 67,378                        |
| Reactive oxygen species modulator 1 (Romo1)                                              | 55,878                   | 32,768                        |
| Proteasome 26S subunit ATPase 5 (Psmc5)                                                  | 55,492                   | 26,801 <sup>†</sup>           |
| TIMP metalloproteinase inhibitor 2 (Timp2)                                               | 55,109                   | 214,408 <sup>†</sup>          |
| Cytochrome c oxidase subunit 1                                                           | 53,975                   | 190,575 <sup>†</sup>          |
| Eukaryotic translation initiation factor 4H (Eif4h)                                      | 51,776                   | 21,469 <sup>†</sup>           |
| T-box 21 (Tbx21)                                                                         | 51,776                   | 48,983                        |
| Dextrin (Dstn)                                                                           | 51,419                   | 36,358                        |
| Similar to keratin complex 1 acidic gene 18                                              | 51,419                   | 7,913 <sup>†</sup>            |
| Mesothelin (Msln)                                                                        | 51,063                   | 58,251                        |
| Tubulin, alpha 1B (Tuba1b)                                                               | 50,012                   | 63,744                        |
| ATP synthase subunit a                                                                   | 38,699                   | 208,545 <sup>†</sup>          |
| Cytochrome c oxidase subunit 3                                                           | 42,348                   | 167,059 <sup>†</sup>          |
| S100 calcium-binding protein A6 (S100a6)                                                 | 40,623                   | 165,905 <sup>†</sup>          |
| Caveolin 1 (Cav1)                                                                        | 43,238                   | 155,872 <sup>†</sup>          |
| Cytochrome c oxidase subunit 2                                                           | 39,787                   | 146,445 <sup>†</sup>          |
| NADH-ubiquinone oxidoreductase chain 4                                                   | 34,397                   | 128,375 <sup>†</sup>          |
| Kelch domain containing 2 (Klhd2)                                                        | 38,431                   | 100,721 <sup>†</sup>          |
| ATP synthase F1 complex epsilon (Atp5e)                                                  | 40,623                   | 94,629 <sup>†</sup>           |
| Growth arrest specific 5 (Gas5)                                                          | 42,055                   | 93,976 <sup>†</sup>           |

**Table W4.** (continued)

| mRNA                                                                     | Mean Signal Strength*    |                                            |
|--------------------------------------------------------------------------|--------------------------|--------------------------------------------|
|                                                                          | ASML <sup>wt</sup> Cells | ASML-CD44 <sup>v</sup> <sup>kd</sup> Cells |
| S100 calcium-binding protein A4 (S100a4)                                 | 5,405                    | 90,148 <sup>†</sup>                        |
| Serum deprivation response (Sdpr)                                        | 24,154                   | 85,285 <sup>†</sup>                        |
| Dynein heavy-10 (Dnah10)                                                 | 49,667                   | 78,478                                     |
| Rap GEF 6 (Rapgef6)                                                      | 48,983                   | 77,936                                     |
| NADH-ubiquinone oxidoreductase chain 2                                   | 7,750                    | 72,717 <sup>†</sup>                        |
| SMT3 suppressor of mif two 3 homolog 2 (Sumo2)                           | 49,667                   | 70,728                                     |
| Caveolin 2 (Cav2)                                                        | 23,170                   | 68,794 <sup>†</sup>                        |
| Thioredoxin 1 (Txn1)                                                     | 44,453                   | 66,913                                     |
| Myosin light chain 6 (Myl6)                                              | 46,341                   | 65,992                                     |
| Translationally controlled tumor protein (TCTP)                          | 43,538                   | 65,536                                     |
| Hepatocyte malignant transforming factor                                 | 38,431                   | 65,083                                     |
| Ubiquinol-cytochrome c reductase complex isoform b                       | 43,841                   | 62,866                                     |
| Eukaryotic translation initiation factor 4E binding protein 1 (Eif4ebp1) | 34,397                   | 62,432                                     |
| Cathepsin B (Ctsb)                                                       | 36,611                   | 60,725                                     |
| Stearoyl-CoA desaturase delta (Scd)                                      | 23,494                   | 59,064 <sup>†</sup>                        |
| Parkinson protein 7 (Park7)                                              | 37,902                   | 57,849                                     |
| Glutathione peroxidase 4 (Gpx4)                                          | 46,021                   | 57,449                                     |
| Acidic (leucine-rich) nuclear phosphoprotein 32B (Anp32b)                | 27,175                   | 57,449                                     |
| Clathrin light chain A (Clta)                                            | 29,944                   | 56,267                                     |
| Suppressor of initiator codon mutations                                  | 33,225                   | 54,728                                     |
| Aminolevulinate dehydratase (Alad)                                       | 38,699                   | 54,350                                     |
| Protein tyrosine phosphatase F (Ptpnf)                                   | 15,076                   | 53,602 <sup>†</sup>                        |
| H1 histone family member 0 (H1f0)                                        | 5,043                    | 53,232 <sup>†</sup>                        |
| Histone cluster 1 H2ak (Hist1h2ak)                                       | 44,762                   | 52,864                                     |
| 2-5 oligoadenylate synthetase 1B (Oas1b)                                 | 35,120                   | 52,499                                     |
| Eukaryotic translation initiation factor 3K (Eif3k)                      | 48,645                   | 50,711                                     |
| Cyclin-dependent kinase inhibitor 2A (Cdkn2a)                            | 27,746                   | 50,711                                     |
| Programmed cell death 5 (Pcd5)                                           | 28,329                   | 50,360                                     |

\*Mean signal strength was calculated from duplicates, respectively, triplicates, after normalization (Chipster analysis and Agilent annotation) of two independently performed microarray analyses. Only cellular mRNA with a signal strength of >50,000 is shown.

<sup>†</sup>Signal strength with a more than two-fold change between ASML<sup>wt</sup> and ASML-CD44<sup>v</sup><sup>kd</sup> cells.

**Table W5.** Distinctly Recovered mRNA in ASML<sup>wt</sup> and ASML-CD44<sup>v</sup><sup>kd</sup> Exosomes *versus* Cells.

| mRNA                                               | Mean Signal Strength* |                 | ASML <sup>wt</sup> Exosomes<br><i>versus</i> Cells | Mean Signal Strength*                |         | ASML-CD44 <sup>v</sup> <sup>kd</sup> Exosomes<br><i>versus</i> Cells |
|----------------------------------------------------|-----------------------|-----------------|----------------------------------------------------|--------------------------------------|---------|----------------------------------------------------------------------|
|                                                    | ASML <sup>wt</sup>    |                 |                                                    | ASML-CD44 <sup>v</sup> <sup>kd</sup> |         |                                                                      |
|                                                    | Exosomes              | Cells           |                                                    | Exosomes                             | Cells   |                                                                      |
| Translationally controlled tumor protein 1 (Tprt1) | 21,555                | 104,273         | 0.21                                               | 20,863                               | 153,726 | 0.14                                                                 |
| Ferritin 1 (Fth1)                                  | 21,061                | 169             | 124.70                                             | 18,061                               | 131     | 138.20                                                               |
| Laminin receptor 1 (Lamr1)                         | 19,878                | nd <sup>†</sup> | ∞                                                  | 20,967                               | nd      | ∞                                                                    |
| Keratin complex 1-19 (Krt1-19)                     | 14,348                | 73              | 197.89                                             | 13,274                               | 79      | 168.47                                                               |
| Actin, beta (Actb)                                 | 12,963                | 106,464         | 0.12                                               | 18,280                               | 48,645  | 0.38                                                                 |
| Calmodulin 2 (Calm2)                               | 12,033                | 51,776          | 0.23                                               | 15,726                               | 60,725  | 0.26                                                                 |
| Ornithine decarboxylase antizyme 1 (Oaz1)          | 11,924                | 90              | 132.67                                             | 13,427                               | 80      | 166.90                                                               |
| Metallothionein (MT1a)                             | 9,659                 | 596             | 16.20                                              | 5,546                                | 526     | 10.54                                                                |
| Peroxiredoxin 1 (Prdx1)                            | 9,436                 | 77              | 122.27                                             | 12,336                               | 104     | 118.65                                                               |
| Non-metastatic cells 2 (Nme2)                      | 9,417                 | nd              | ∞                                                  | 9,113                                | nd      | ∞                                                                    |
| Phosphoglycerate kinase 1 (Pgk1)                   | 9,391                 | 89              | 105.21                                             | 12,013                               | 131     | 91.92                                                                |
| Annexin A2 (Anxa2)                                 | 9,196                 | 145,433         | 0.06                                               | 8,734                                | 133,826 | 0.07                                                                 |
| Synaptic vesicle glycoprotein 2b (Sv2b)            | 9,153                 | nd              | ∞                                                  | 3,304                                | nd      | ∞                                                                    |
| Annexin A1 (Anxa1)                                 | 9,072                 | 129,267         | 0.07                                               | 9,408                                | 101,421 | 0.09                                                                 |
| Villin 2 (Vil2)                                    | 9,071                 | nd              | ∞                                                  | 7,751                                | nd      | ∞                                                                    |
| Diazepam binding inhibitor (Dbi)                   | 8,840                 | 80              | 109.88                                             | 10,165                               | 78      | 130.81                                                               |
| Macrophage migration inhibitory factor (Mif)       | 8,578                 | 135             | 63.40                                              | 9,533                                | 85      | 112.10                                                               |
| Galactose binding lectin, soluble 3 (Lgals3)       | 8,566                 | 72              | 119.79                                             | 6,559                                | 68      | 96.29                                                                |
| Peroxiredoxin 2 (Prdx2)                            | 8,476                 | 370             | 22.93                                              | 10,633                               | 187     | 56.74                                                                |
| Cell division cycle 37 homolog (Cdc37)             | 8,377                 | 405             | 20.71                                              | 11,208                               | 269     | 41.71                                                                |
| S100 calcium-binding protein A6 (S100a6)           | 8,297                 | 1,287           | 6.44                                               | 7,497                                | 357     | 21.00                                                                |
| Brain protein I3 (Bri3)                            | 8,064                 | 21,028          | 0.38                                               | 10,520                               | 15,936  | 0.66                                                                 |
| Cofilin 1 (Cfl1)                                   | 8,043                 | 46,988          | 0.17                                               | 12,817                               | 25,709  | 0.50                                                                 |
| Basic keratin complex 2-8 (Krt2-8)                 | 8,015                 | nd              | ∞                                                  | 7,486                                | nd      | ∞                                                                    |
| Phosphatidylethanolamine-binding protein (Pbp)     | 7,653                 | 843             | 9.07                                               | 8,791                                | 867     | 10.14                                                                |
| Proteasome subunit beta 1 (Psm1)                   | 7,626                 | 80              | 95.46                                              | 8,227                                | 68      | 121.61                                                               |
| Aldose reductase 1-B4 (Akr1b4)                     | 7,411                 | 4,096           | 1.81                                               | 8,827                                | 2,937   | 3.01                                                                 |

Table W5. (continued)

| mRNA                                                                                 | Mean Signal Strength* |        | ASML <sup>wt</sup> Exosomes<br>versus Cells | Mean Signal Strength*    |        | ASML-CD44v <sup>kd</sup> Exosomes<br>versus Cells |
|--------------------------------------------------------------------------------------|-----------------------|--------|---------------------------------------------|--------------------------|--------|---------------------------------------------------|
|                                                                                      | ASML <sup>wt</sup>    |        |                                             | ASML-CD44v <sup>kd</sup> |        |                                                   |
|                                                                                      | Exosomes              | Cells  |                                             | Exosomes                 | Cells  |                                                   |
| Profilin 1 (Pfn1)                                                                    | 6,662                 | 187    | 35.55                                       | 5,998                    | 67     | 89.27                                             |
| Heat shock protein 8 (Hspa8)                                                         | 6,577                 | 6,165  | 1.06                                        | 4,584                    | 3,236  | 1.41                                              |
| Cell division cycle 42 (Cdc42)                                                       | 6,492                 | 519    | 12.51                                       | 10,242                   | 298    | 34.35                                             |
| Glutathione peroxidase 2 (Gpx2)                                                      | 6,434                 | 1,226  | 5.25                                        | 4,124                    | 1,209  | 3.41                                              |
| Cytochrome c, somatic (Cycs)                                                         | 6,401                 | 343    | 18.69                                       | 8,157                    | 910    | 8.96                                              |
| Protein phosphatase 1-14B (Ppp1r14b)                                                 | 6,280                 | 34,397 | 0.18                                        | 4,807                    | 22,227 | 0.22                                              |
| Adaptor-related protein complex 2-sigma 1 (Ap2s1)                                    | 6,237                 | 21,619 | 0.29                                        | 7,003                    | 12,944 | 0.54                                              |
| Transmembrane trafficking protein 21 (Ttmp21)                                        | 6,161                 | nd     | ∞                                           | 5,505                    | nd     | ∞                                                 |
| Proliferating cell nuclear antigen (Pcna)                                            | 5,845                 | 21,469 | 0.27                                        | 7,698                    | 11,426 | 0.67                                              |
| Tyrosine 3-monooxygenase/tryptophan 5-monooxygenase activation protein, zeta (Ywhaz) | 5,843                 | 4,012  | 1.46                                        | 7,178                    | 5,293  | 1.36                                              |
| Proteasome beta-4 (Psmb4)                                                            | 5,697                 | 5,113  | 1.11                                        | 6,876                    | 1,053  | 6.53                                              |
| Superoxide dismutase 1 (Sod1)                                                        | 5,639                 | 49,324 | 0.11                                        | 6,120                    | 33,225 | 0.18                                              |
| ATPase, H+ transporting, V0-C (Atp6v0c)                                              | 5,550                 | 13,777 | 0.40                                        | 5,220                    | 10,441 | 0.50                                              |
| Proteolipid protein 2 (Plp2)                                                         | 5,549                 | 3,692  | 1.50                                        | 4,413                    | 4,939  | 0.89                                              |
| Non-metastatic cells 1 (Nme1)                                                        | 5,487                 | 20,453 | 0.27                                        | 5,242                    | 16,845 | 0.31                                              |
| C-terminal binding protein 1 (Ctbp1)                                                 | 5,416                 | 24,492 | 0.22                                        | 8,964                    | 11,191 | 0.80                                              |
| ARP2 actin-related 2 (Actr2)                                                         | 5,387                 | 5,914  | 0.91                                        | 7,636                    | 5,480  | 1.39                                              |
| Cytochrome c oxidase VIIIb (Cox7b)                                                   | 5,263                 | 74     | 71.59                                       | 5,238                    | 69     | 75.83                                             |
| Integrin beta 4 binding protein (Itgb4bp)                                            | 5,252                 | 8,719  | 0.60                                        | 4,039                    | 27,939 | 0.14                                              |
| Proteasome beta 2 (Psmb2)                                                            | 5,169                 | 176    | 29.36                                       | 5,941                    | 74     | 80.81                                             |
| Radixin (Rdx)                                                                        | 5,165                 | 17,929 | 0.29                                        | 4,787                    | 187    | 25.54                                             |
| Cyclin D1 (Cnd1)                                                                     | 5,160                 | 4,576  | 1.13                                        | 8,670                    | 1,783  | 4.86                                              |
| Peptidylprolyl isomerase B (Ppib)                                                    | 5,083                 | 68     | 75.14                                       | 3,001                    | 72     | 41.68                                             |
| S-phase kinase-associated 1A (Skp1a)                                                 | 4,916                 | 10,369 | 0.47                                        | 5,992                    | 5,914  | 1.01                                              |
| Tubulin beta 2 (Tubb2)                                                               | 4,851                 | 609    | 7.97                                        | 6,840                    | 1,160  | 5.90                                              |
| SMT3 suppressor of mif two 3-1 (Sumo1)                                               | 4,843                 | 7,913  | 0.61                                        | 7,168                    | 8,192  | 0.88                                              |
| Glutathione peroxidase 4 (Gpx4)                                                      | 4,840                 | 93     | 52.01                                       | 4,487                    | 75     | 60.19                                             |
| Chromobox homolog 3 (Cbx3)                                                           | 4,839                 | 1,113  | 4.35                                        | 5,945                    | 798    | 7.45                                              |
| Poly(A)-binding protein 1 (Pabpc1)                                                   | 4,788                 | 186    | 25.73                                       | 3,177                    | 239    | 13.30                                             |
| Dynein light chain 2A (Dncl2a)                                                       | 4,747                 | 2,320  | 2.05                                        | 3,733                    | 1,003  | 3.72                                              |
| Aldo-keto reductase 1-A1 (Akr1a1)                                                    | 4,656                 | 9,345  | 0.50                                        | 7,095                    | 12,161 | 0.58                                              |
| Tyrosine 3/tryptophan 5-monooxygenase ε (Ywhae)                                      | 4,646                 | 31,433 | 0.15                                        | 9,089                    | 33,689 | 0.27                                              |
| MAP kinase kinase 2 (Map2k2)                                                         | 4,573                 | 30,362 | 0.15                                        | 4,357                    | 26,801 | 0.16                                              |
| S100 calcium-binding protein A4 (S100a4)                                             | 4,495                 | 92     | 48.98                                       | 4,424                    | 1,261  | 3.51                                              |
| Dynein light chain 1 (Dncl1)                                                         | 4,444                 | 333    | 13.34                                       | 3,237                    | 508    | 6.37                                              |
| ATX1-1 (Atox1)                                                                       | 4,389                 | 13,308 | 0.33                                        | 3,323                    | 6,383  | 0.52                                              |
| Beta-2 microglobulin (B2m)                                                           | 4,380                 | 26,987 | 0.16                                        | 3,997                    | 22,694 | 0.18                                              |
| Aldolase A (Aldoa)                                                                   | 4,313                 | 19,619 | 0.22                                        | 2,549                    | 8,841  | 0.29                                              |
| Lactate dehydrogenase A (Ldha)                                                       | 4,278                 | 333    | 12.84                                       | 3,623                    | 498    | 7.28                                              |
| RAN, member RAS oncogene family (Ran)                                                | 4,266                 | 72     | 59.66                                       | 4,704                    | 167    | 28.24                                             |
| Hepatoma-derived growth factor (Hdgf)                                                | 4,232                 | 48,309 | 0.09                                        | 5,068                    | 35,364 | 0.14                                              |
| Catenin alpha 1 (Ctnn1)                                                              | 4,168                 | 3,169  | 1.32                                        | 7,307                    | 3,083  | 2.37                                              |
| Complement component 1q (C1qbp)                                                      | 4,158                 | 516    | 8.07                                        | 4,389                    | 2,759  | 1.59                                              |
| Fertility protein SP22 (Park7)                                                       | 4,146                 | nd     | ∞                                           | 5,720                    | nd     | ∞                                                 |
| Thioredoxin 1 (Txn1)                                                                 | 4,141                 | 44,453 | 0.09                                        | 3,567                    | 66,913 | 0.05                                              |
| Chaperonin subunit 4 (Cct4)                                                          | 4,101                 | 127    | 32.26                                       | 4,233                    | 162    | 26.13                                             |
| Transaldolase 1 (Taldo1)                                                             | 3,997                 | 10,441 | 0.38                                        | 6,234                    | 13,308 | 0.47                                              |
| NADH dehydrogenase 1 alpha-5 (Ndufa5)                                                | 3,923                 | 83     | 47.43                                       | 4,170                    | 73     | 57.12                                             |
| Cytochrome c oxidase Va (Cox5a)                                                      | 3,901                 | 452    | 8.63                                        | 2,557                    | 252    | 10.13                                             |
| cAMP-regulated phosphoprotein 19 (Arpp19)                                            | 3,899                 | 15,608 | 0.25                                        | 2,628                    | 7,132  | 0.37                                              |
| Proteasome 26S subunit 3 (Psm3)                                                      | 3,880                 | 556    | 6.97                                        | 4,621                    | 85     | 54.34                                             |
| Cytochrome c oxidase subunit IV-1 (Cox4i1)                                           | 3,864                 | 79     | 49.04                                       | 3,441                    | 77     | 44.59                                             |
| Amino-terminal enhancer of split (Aes)                                               | 3,864                 | 1,287  | 3.00                                        | 3,421                    | 750    | 4.56                                              |
| Proteasome beta-3 (Psm3)                                                             | 3,860                 | 2,610  | 1.48                                        | 5,159                    | 152    | 33.89                                             |
| Myelocytomatosis viral oncogene- (Myc)                                               | 3,854                 | 792    | 4.86                                        | 3,028                    | 508    | 6.00                                              |
| LIM domain only 4 (Lmo4)                                                             | 3,812                 | 322    | 11.85                                       | 4,896                    | 413    | 11.85                                             |
| Cyclin-dependent kinase 4 (Cdk4)                                                     | 3,807                 | 639    | 5.96                                        | 4,695                    | 942    | 4.98                                              |
| Spastic paraplegia 21 (Spg21)                                                        | 3,786                 | 3,421  | 1.11                                        | 3,641                    | 1,351  | 2.69                                              |
| Proteasome alpha-6 (Psm6)                                                            | 3,740                 | 311    | 12.03                                       | 4,015                    | 81     | 49.56                                             |
| FK506 binding protein 1a (Fkbp1a)                                                    | 3,734                 | 91     | 41.26                                       | 3,195                    | 91     | 35.06                                             |
| Cold shock domain protein A (CsdA)                                                   | 3,682                 | 107    | 34.45                                       | 4,488                    | 81     | 55.40                                             |
| Neural precursor cell expressed, developmentally downregulated 8 (Nedd8)             | 3,674                 | 4,705  | 0.78                                        | 2,801                    | 9,675  | 0.29                                              |
| Rho GDP dissociation inhibitor (GDI) alpha                                           | 3,662                 | 202    | 18.11                                       | 5,106                    | 95     | 53.74                                             |
| Guanine nucleotide binding protein α inhibitor 2 (Gnai2)                             | 3,635                 | 1,846  | 2.00                                        | 3,602                    | 1,399  | 2.57                                              |
| Peroxiredoxin 5 (Prdx5)                                                              | 3,602                 | 71     | 51.07                                       | 3,060                    | 71     | 43.09                                             |
| DnaJ (Hsp40)subfamily A-2 (Dnaja2)                                                   | 3,586                 | 76     | 47.44                                       | 5,134                    | 78     | 65.61                                             |
| Spermidine/spermine N <sup>1</sup> -acetyl transferase (Sat)                         | 3,571                 | 7,332  | 0.49                                        | 3,937                    | 15,500 | 0.25                                              |

**Table W5.** (continued)

| mRNA                                                                   | Mean Signal Strength* |        | ASML <sup>wt</sup> Exosomes<br>versus Cells | Mean Signal Strength*   |        | ASML-CD44 <sup>kd</sup> Exosomes<br>versus Cells |
|------------------------------------------------------------------------|-----------------------|--------|---------------------------------------------|-------------------------|--------|--------------------------------------------------|
|                                                                        | ASML <sup>wt</sup>    |        |                                             | ASML-CD44 <sup>kd</sup> |        |                                                  |
|                                                                        | Exosomes              | Cells  |                                             | Exosomes                | Cells  |                                                  |
| CD24                                                                   | 3,455                 | 2,353  | 1.47                                        | 4,445                   | 3,541  | 1.26                                             |
| Aldo-keto reductase 1-B8 (Akr1b8)                                      | 3,432                 | 30,153 | 0.11                                        | 1,313                   | 6,794  | 0.19                                             |
| Annexin A4 (Anxa4)                                                     | 3,421                 | 101    | 33.83                                       | 4,578                   | 90     | 50.94                                            |
| Tubulin alpha 1 (Tuba1)                                                | 3,388                 | 28,924 | 0.12                                        | 5,870                   | 14,869 | 0.39                                             |
| Galactokinase 1 (Galk1)                                                | 3,366                 | 91     | 37.19                                       | 4,419                   | 95     | 46.51                                            |
| ARP10 actin-related protein 10 (Actr10)                                | 3,336                 | 11,666 | 0.29                                        | 4,332                   | 5,793  | 0.75                                             |
| S-adenosylhomocysteine hydrolase (Ahcy)                                | 3,328                 | nd     | ∞                                           | 2,459                   | nd     | ∞                                                |
| NADH dehydrogenase 1 alpha 11 (Ndufa11)                                | 3,324                 | 180    | 18.49                                       | 3,244                   | 155    | 20.87                                            |
| t-complex protein 1 (Tcpl)                                             | 3,294                 | 25,709 | 0.13                                        | 3,109                   | 21,769 | 0.14                                             |
| Phosphoserine phosphatase (Psp)                                        | 3,287                 | 107    | 30.75                                       | 3,115                   | 94     | 33.01                                            |
| Inosine 5-monophosphate dehydrog.2 (Impdh2)                            | 3,261                 | nd     | ∞                                           | 2,763                   | nd     | ∞                                                |
| Chaperonin subunit 3 (Cct3)                                            | 3,249                 | 5,753  | 0.56                                        | 4,492                   | 5,955  | 0.75                                             |
| Protein phosphatase 2a alpha (Ppp2ca)                                  | 3,218                 | 2,402  | 1.34                                        | 3,835                   | 2,353  | 1.63                                             |
| Upregulated by 1,25-dihydroxyvitamin D-3 (Txnip)                       | 3,214                 | 3,492  | 0.92                                        | 6,130                   | 6,039  | 1.02                                             |
| Microtubule-associated protein light chain 1A/1B<br>light 3 (Map1lc3b) | 3,176                 | 1,438  | 2.21                                        | 6,066                   | 449    | 13.51                                            |
| Glucose phosphate isomerase (Gpi)                                      | 3,158                 | 71     | 44.78                                       | 3,444                   | 87     | 39.39                                            |
| Annexin A5 (Anxa5)                                                     | 3,115                 | 5,634  | 0.55                                        | 2,642                   | 3,566  | 0.74                                             |
| Coated vesicle membrane protein (Rnp24)                                | 3,115                 | nd     | ∞                                           | 2,593                   | nd     | ∞                                                |
| Peroxiredoxin 6 (Prdx6)                                                | 3,108                 | 74     | 41.98                                       | 3,706                   | 67     | 55.54                                            |
| GDP dissociation inhibitor 2 (Gdi2)                                    | 3,077                 | 70     | 44.24                                       | 5,625                   | 69     | 81.43                                            |
| Cytochrome c oxidase subunit Vb (Cox5b)                                | 3,037                 | 83     | 36.46                                       | 2,219                   | 74     | 30.19                                            |
| MAP kinase-interacting serine/threonine<br>kinase 2 (Mknk2)            | 3,025                 | nd     | ∞                                           | 3,221                   | nd     | ∞                                                |

\*mRNA was ordered according to the signal strength in ASML<sup>wt</sup> exosomes (mean signal strength was calculated from duplicates, respectively, triplicates, after normalization of two independently performed microarray analyses. Only defined mRNA with a mean signal strength of >3000 was included.

†nd: below the detection limit in cell extract. There has been no ASML-CD44<sup>kd</sup> mRNA opposing regulated in cells versus exosomes.



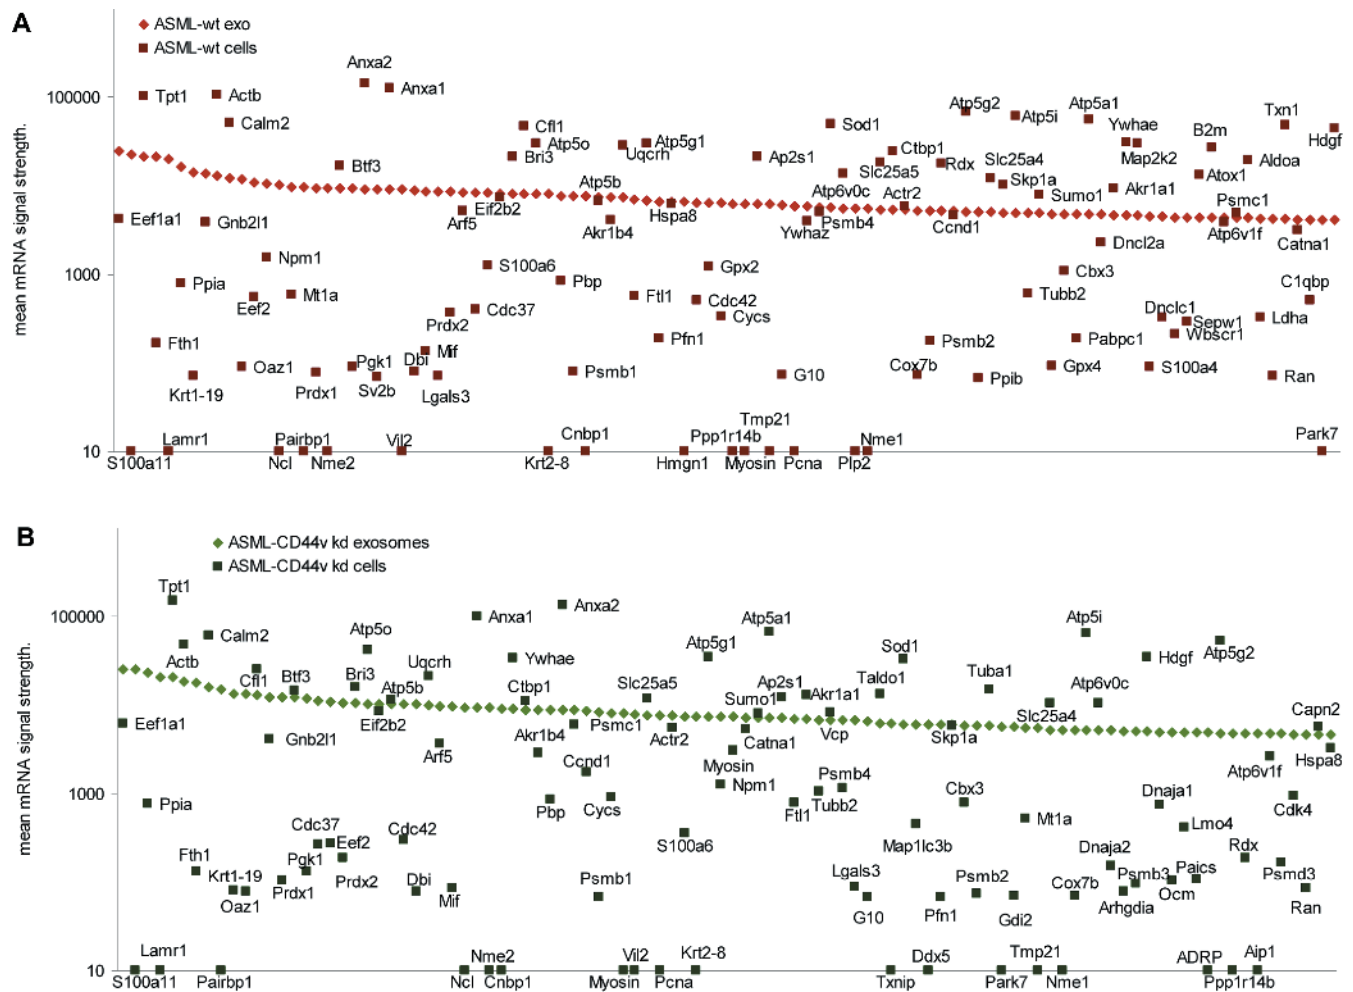

**Figure W1.** Comparison of ASML<sup>wt</sup> and ASML-CD44v<sup>kd</sup> exosomal *versus* cellular mRNA. (A) The 100 exosomal ASML<sup>wt</sup> mRNAs with the highest signal strength and, for comparison, the corresponding cellular mRNAs and (B) the 100 exosomal ASML-CD44v<sup>kd</sup> mRNAs with the highest signal strength and, for comparison, the corresponding cellular mRNAs are shown. The mean signal strength of duplicates, respectively, triplicates, of two independent microarray analyses is shown. For more detailed information and full names, see Table W5. Independent of CD44v expression, the composition of exosomal and cellular mRNAs differs strongly.

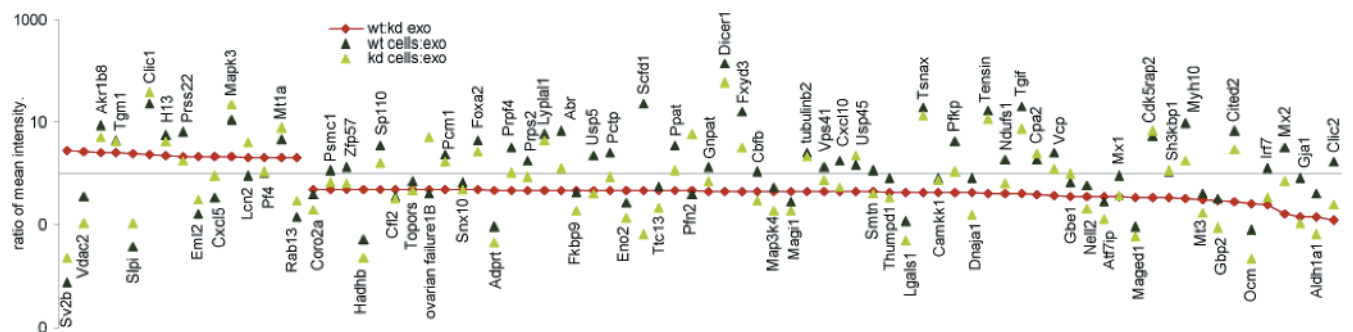

**Figure W2.** Comparison of the ratio of exosomal ASML<sup>wt</sup> to ASML-CD44v<sup>kd</sup> mRNA with the ratio of cellular to exosomal mRNA: Scatter blot of exosomal mRNA that differs more than two-fold between ASML<sup>wt</sup> *versus* ASML-CD44v<sup>kd</sup> exosomes as well as the ratios of the ASML<sup>wt</sup> and ASML-CD44v<sup>kd</sup> cellular to exosomal mRNA. For abbreviations, see Tables W4 and W5. With four exceptions (ovarian failure1B, Scfd1, Pfn2, and Clic2), signals for both ASML<sup>wt</sup> and ASML-CD44v<sup>kd</sup> cellular mRNA are either enriched or reduced compared to the exosomal mRNA signal strength. This finding strongly argues against CD44v being directly engaged in mRNA recruitment into MVB.

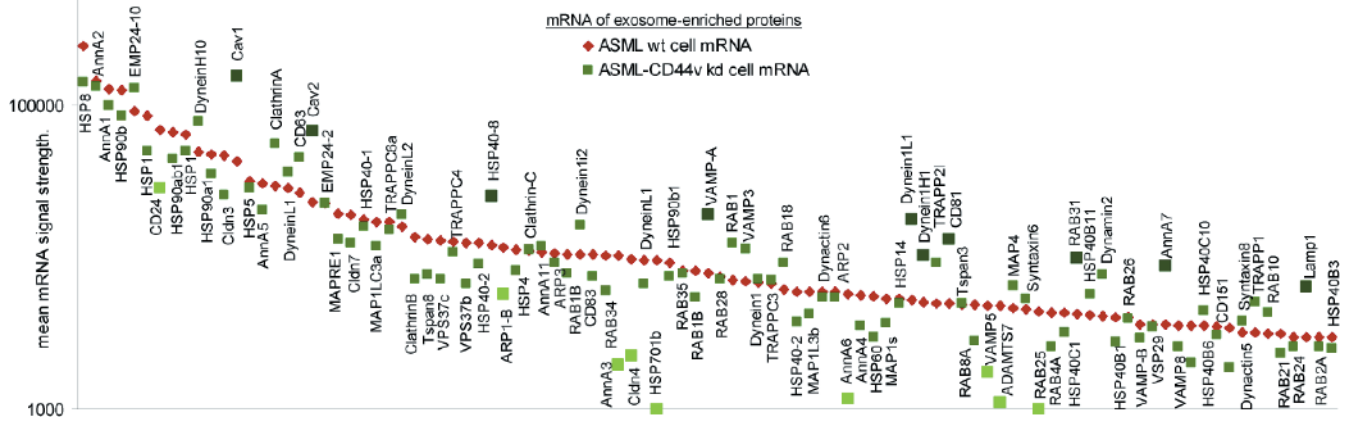

**Figure W3.** Comparison of cellular ASML<sup>wt</sup> and ASML-CD44v<sup>kd</sup> mRNA whose proteins are enriched in exosomes: Scatter blot of mean cellular mRNA signal strength in ASML<sup>wt</sup> and ASML-CD44v<sup>kd</sup> cells. Only mRNAs whose proteins are known to be enriched in exosomes are shown, where from 164 mRNAs the 100 with high signal strength have been selected. The mean signal strength of duplicates, respectively, triplicates, of two independent microarray analyses is shown. mRNAs with a more than two-fold change in the signal strength between ASML<sup>wt</sup> *versus* ASML-CD44v<sup>kd</sup> cells are indicated by larger symbols. For abbreviations, see Table W3. In comparison to the impact of CD44v on the total cellular mRNA, CD44v rather abundantly affects mRNA, where translation products are enriched in exosomes.

**Table W6.** miRNA in ASML<sup>wt</sup> and ASML-CD44v<sup>kd</sup> Exosomes and Cells.

| (A) Exosomal miRNA |                       |                          |                                                       |
|--------------------|-----------------------|--------------------------|-------------------------------------------------------|
| miRNA              | Mean Signal Strength* |                          | ASML <sup>wt</sup> /ASML-CD44v <sup>kd</sup> Exosomes |
|                    | ASML <sup>wt</sup>    | ASML-CD44v <sup>kd</sup> |                                                       |
| Exosomes           |                       |                          |                                                       |
| let-7a             | 2,710                 | 2,808                    | 0.97                                                  |
| let-7b             | 5,038                 | 14,760                   | 0.34 <sup>†</sup>                                     |
| let-7c             | 24,097                | 29,257                   | 0.82                                                  |
| let-7d             | 1,148                 | 377                      | 3.04 <sup>†</sup>                                     |
| let-7e             | 12,646                | 32,111                   | 0.39 <sup>†</sup>                                     |
| let-7f             | 961                   | 971                      | 0.99                                                  |
| let-7i             | 346                   | 561                      | 0.62                                                  |
| miR-101b           | 285                   | 853                      | 0.33 <sup>†</sup>                                     |
| miR-103            | 1,468                 | 637                      | 2.30 <sup>†</sup>                                     |
| miR-106b           | 1,520                 | 2,228                    | 0.68                                                  |
| miR-10a-3p         | 425                   | 484                      | 0.88                                                  |
| miR-10a-5p         | 166                   | 445                      | 0.37 <sup>†</sup>                                     |
| miR-122            | 236                   | 400                      | 0.59                                                  |
| miR-124            | 2,332                 | 1,163                    | 2.00 <sup>†</sup>                                     |
| miR-125a-3p        | 1,574                 | 1,815                    | 0.87                                                  |
| miR-125a-5p        | 9,079                 | 2,077                    | 4.37 <sup>†</sup>                                     |
| miR-125b-3p        | 29,549                | 5,541                    | 5.33 <sup>†</sup>                                     |
| miR-125b-5p        | 2,144                 | 1,825                    | 1.18                                                  |
| miR-127            | 1,209                 | 356                      | 3.40 <sup>†</sup>                                     |
| miR-129            | 15,607                | 7,956                    | 1.96                                                  |
| miR-130b           | 3,032                 | 2,086                    | 1.45                                                  |
| miR-138            | 1,791                 | 3,036                    | 0.59                                                  |
| miR-142-5p         | 541                   | 990                      | 0.55                                                  |
| miR-147            | 337                   | 496                      | 0.68                                                  |
| miR-148b-3p        | 1,924                 | 528                      | 3.64 <sup>†</sup>                                     |
| miR-150            | 2,415                 | 2,151                    | 1.12                                                  |
| miR-183            | 429                   | 292                      | 1.47                                                  |
| miR-184            | 5,936                 | 7,438                    | 0.80                                                  |
| miR-185            | 655                   | 1,510                    | 0.43 <sup>†</sup>                                     |
| miR-193            | 416                   | 191                      | 2.17 <sup>†</sup>                                     |
| miR-196a           | 293                   | 416                      | 0.70                                                  |
| miR-200b           | 492                   | 339                      | 1.45                                                  |
| miR-200c           | 697                   | 511                      | 1.36                                                  |
| miR-204            | 24,335                | 23,711                   | 1.03                                                  |
| miR-206            | 6,513                 | 4,944                    | 1.32                                                  |
| miR-207            | 4,876                 | 8,012                    | 0.61                                                  |
| miR-208            | 686                   | 941                      | 0.73                                                  |
| miR-21             | 11,462                | 5,333                    | 2.15 <sup>†</sup>                                     |
| miR-214            | 9,826                 | 3,482                    | 2.82 <sup>†</sup>                                     |
| miR-22             | 427                   | 945                      | 0.45 <sup>†</sup>                                     |
| miR-221            | 1,421                 | 979                      | 1.45                                                  |
| miR-222            | 848                   | 909                      | 0.93                                                  |
| miR-23a            | 692                   | 754                      | 0.92                                                  |
| miR-23b            | 1,401                 | 1,120                    | 1.25                                                  |
| miR-24             | 35,571                | 6,978                    | 5.10 <sup>†</sup>                                     |
| miR-26b            | 7,022                 | 26,350                   | 0.27                                                  |
| miR-290            | 12,052                | 11,948                   | 1.01                                                  |
| miR-291a-5p        | 5,534                 | 627                      | 8.83 <sup>†</sup>                                     |
| miR-296            | 33,359                | 9,235                    | 3.61 <sup>†</sup>                                     |
| miR-298            | 266                   | 454                      | 0.59                                                  |
| miR-29a            | 1,808                 | 911                      | 1.99                                                  |
| miR-29b            | 1,281                 | 676                      | 1.90                                                  |
| miR-29c            | 1,118                 | 533                      | 2.10 <sup>†</sup>                                     |
| miR-300-3p         | 1,951                 | 1,213                    | 1.61                                                  |
| miR-300-5p         | 65,490                | 7,287                    | 8.99 <sup>†</sup>                                     |
| miR-30b-3p         | 2,348                 | 5,402                    | 0.43 <sup>†</sup>                                     |
| miR-30b-5p         | 345                   | 401                      | 0.86                                                  |
| miR-30c            | 5,715                 | 1,870                    | 3.06 <sup>†</sup>                                     |
| miR-31             | 533                   | 563                      | 0.95                                                  |
| miR-323            | 1,910                 | 964                      | 1.98                                                  |
| miR-325-3p         | 7,129                 | 5,608                    | 1.27                                                  |
| miR-325-5p         | 522                   | 1,617                    | 0.32 <sup>†</sup>                                     |
| miR-327            | 463                   | 392                      | 1.18                                                  |
| miR-329            | 745                   | 1,048                    | 0.71                                                  |
| miR-330            | 285                   | 1,181                    | 0.24 <sup>†</sup>                                     |
| miR-331            | 585                   | 4,471                    | 0.13                                                  |
| miR-341            | 13,956                | 9,369                    | 1.49                                                  |
| miR-342-5p         | 404                   | 999                      | 0.40 <sup>†</sup>                                     |
| miR-347            | 801                   | 1,084                    | 0.74                                                  |
| miR-34a            | 650                   | 5,420                    | 0.12 <sup>†</sup>                                     |

**Table W6.** (continued)

| (A) Exosomal miRNA |                       |                          |                                                       |
|--------------------|-----------------------|--------------------------|-------------------------------------------------------|
| miRNA              | Mean Signal Strength* |                          | ASML <sup>wt</sup> /ASML-CD44v <sup>kd</sup> Exosomes |
|                    | ASML <sup>wt</sup>    | ASML-CD44v <sup>kd</sup> |                                                       |
| Exosomes           |                       |                          |                                                       |
| miR-34c            | 410                   | 565                      | 0.72                                                  |
| miR-350            | 245                   | 455                      | 0.54                                                  |
| miR-351            | 3,707                 | 1,558                    | 2.38 <sup>†</sup>                                     |
| miR-352            | 435                   | 525                      | 0.83                                                  |
| miR-361            | 777                   | 950                      | 0.82                                                  |
| miR-363            | 1,692                 | 181                      | 9.34 <sup>†</sup>                                     |
| miR-370            | 98                    | 579                      | 0.17 <sup>†</sup>                                     |
| miR-377            | 324                   | 753                      | 0.43 <sup>†</sup>                                     |
| miR-381            | 433                   | 480                      | 0.90                                                  |
| miR-382            | 18,070                | 3,630                    | 4.98 <sup>†</sup>                                     |
| miR-409-5p         | 375                   | 1,801                    | 0.21 <sup>†</sup>                                     |
| miR-423            | 4,548                 | 1,448                    | 3.14 <sup>†</sup>                                     |
| miR-466c           | 403                   | 674                      | 0.60                                                  |
| miR-471            | 432                   | 826                      | 0.52                                                  |
| miR-494            | 31,123                | 14,605                   | 2.13 <sup>†</sup>                                     |
| miR-500            | 1,225                 | 548                      | 2.24 <sup>†</sup>                                     |
| miR-503            | 14,520                | 7,329                    | 1.98                                                  |
| miR-540            | 378                   | 578                      | 0.66                                                  |
| miR-542-3p         | 14,225                | 2,133                    | 6.67 <sup>†</sup>                                     |
| miR-542-5p         | 463                   | 213                      | 2.18 <sup>†</sup>                                     |
| miR-551b           | 1,794                 | 2,050                    | 0.87                                                  |
| miR-652            | 436                   | 129                      | 3.38 <sup>†</sup>                                     |
| miR-664            | 386                   | 592                      | 0.65                                                  |
| miR-743a           | 247                   | 611                      | 0.40 <sup>†</sup>                                     |
| miR-743b           | 277                   | 497                      | 0.56                                                  |
| miR-7a             | 569                   | 5,188                    | 0.11 <sup>†</sup>                                     |
| miR-872            | 851                   | 706                      | 1.21                                                  |
| miR-874            | 3,096                 | 1,075                    | 2.88 <sup>†</sup>                                     |
| miR-877            | 4,763                 | 4,625                    | 1.03                                                  |
| miR-96             | 417                   | 118                      | 3.54 <sup>†</sup>                                     |
| miR-98             | 453                   | 559                      | 0.81                                                  |
| miR-99b            | 1,359                 | 5,133                    | 0.26 <sup>†</sup>                                     |

  

| (B) Cellular miRNA |                       |                          |                                                    |
|--------------------|-----------------------|--------------------------|----------------------------------------------------|
| miRNA              | Mean Signal Strength* |                          | ASML <sup>wt</sup> /ASML-CD44v <sup>kd</sup> Cells |
|                    | ASML <sup>wt</sup>    | ASML-CD44v <sup>kd</sup> |                                                    |
| Cells              |                       |                          |                                                    |
| let-7a             | 13,560                | 15,699                   | 0.86                                               |
| let-7b             | 7,125                 | 10,683                   | 0.67                                               |
| let-7c             | 7,963                 | 15,121                   | 0.53                                               |
| let-7d             | 6,440                 | 5,844                    | 1.10                                               |
| let-7e             | 1,158                 | 3,018                    | 0.38 <sup>†</sup>                                  |
| let-7f             | 15,565                | 16,357                   | 0.95                                               |
| let-7i             | 4,485                 | 5,129                    | 0.87                                               |
| miR-100            | 935                   | 1,401                    | 0.67                                               |
| miR-101b           | 700                   | 488                      | 1.43                                               |
| miR-103            | 2,369                 | 2,380                    | 1.00                                               |
| miR-106b           | 4,409                 | 4,475                    | 0.99                                               |
| miR-107            | 2,664                 | 2,503                    | 1.06                                               |
| miR-10a-5p         | 5,116                 | 6,966                    | 0.73                                               |
| miR-1224           | 992                   | 566                      | 1.75                                               |
| miR-125a-5p        | 630                   | 1,424                    | 0.44 <sup>†</sup>                                  |
| miR-125b-5p        | 32,799                | 46,281                   | 0.71                                               |
| miR-128            | 491                   | 429                      | 1.15                                               |
| miR-130a           | 3,199                 | 5,535                    | 0.58                                               |
| miR-130b           | 1,396                 | 1,288                    | 1.08                                               |
| miR-140            | 689                   | 814                      | 0.85                                               |
| miR-141            | 1,744                 | 607                      | 2.87 <sup>†</sup>                                  |
| miR-148b-3p        | 501                   | 466                      | 1.08                                               |
| miR-151            | 857                   | 1,056                    | 0.81                                               |
| miR-15b            | 5,295                 | 5,005                    | 1.06                                               |
| miR-16             | 10,127                | 9,008                    | 1.12                                               |
| miR-181c           | 428                   | 708                      | 0.60                                               |
| miR-181d           | 453                   | 467                      | 0.97                                               |
| miR-182            | 948                   | 845                      | 1.12                                               |
| miR-183            | 1,854                 | 2,431                    | 0.76                                               |

**Table W6. (continued)**

| miRNA      | Mean Signal Strength* |                         | ASML <sup>wt</sup> /ASML-CD44 <sup>kd</sup> Cells |
|------------|-----------------------|-------------------------|---------------------------------------------------|
|            | ASML <sup>wt</sup>    | ASML-CD44 <sup>kd</sup> |                                                   |
|            | Cells                 |                         |                                                   |
| miR-185    | 749                   | 432                     | 1.73                                              |
| miR-186    | 1,606                 | 610                     | 2.63 <sup>†</sup>                                 |
| miR-193    | 329                   | 498                     | 0.66                                              |
| miR-1949   | 2,018                 | 614                     | 3.29 <sup>†</sup>                                 |
| miR-196c   | 793                   | 456                     | 1.74                                              |
| miR-200a   | 2,646                 | 560                     | 4.73 <sup>†</sup>                                 |
| miR-200b   | 4,467                 | 949                     | 4.71 <sup>†</sup>                                 |
| miR-200c   | 1,192                 | 186                     | 6.40 <sup>†</sup>                                 |
| miR-203    | 1,524                 | 2,645                   | 0.58                                              |
| miR-207    | 286                   | 523                     | 0.55                                              |
| miR-21     | 57,732                | 47,159                  | 1.22                                              |
| miR-210    | 747                   | 1,056                   | 0.71                                              |
| miR-218a   | 307                   | 548                     | 0.56                                              |
| miR-22     | 4,177                 | 5,884                   | 0.71                                              |
| miR-221    | 2,233                 | 5,340                   | 0.42                                              |
| miR-222    | 1,217                 | 1,459                   | 0.83                                              |
| miR-23a    | 12,378                | 22,556                  | 0.55                                              |
| miR-23b    | 4,652                 | 5,909                   | 0.79                                              |
| miR-24     | 6,898                 | 13,293                  | 0.52                                              |
| miR-25     | 4,572                 | 3,947                   | 1.16                                              |
| miR-26a    | 3,053                 | 4,094                   | 0.75                                              |
| miR-26b    | 2,252                 | 3,084                   | 0.73                                              |
| miR-27a    | 4,819                 | 12,832                  | 0.38 <sup>†</sup>                                 |
| miR-27b    | 2,823                 | 3,969                   | 0.71                                              |
| miR-28     | 555                   | 431                     | 1.29                                              |
| miR-29a    | 37,744                | 37,658                  | 1.00                                              |
| miR-29b    | 11,953                | 24,913                  | 0.48 <sup>†</sup>                                 |
| miR-29c    | 2,719                 | 2,862                   | 0.95                                              |
| miR-301a   | 469                   | 1,559                   | 0.30 <sup>†</sup>                                 |
| miR-30a    | 928                   | 1,013                   | 0.92                                              |
| miR-30b-5p | 1,262                 | 1,222                   | 1.03                                              |
| miR-30c    | 2,404                 | 2,207                   | 1.09                                              |
| miR-30d    | 492                   | 478                     | 1.03                                              |
| miR-30e    | 1,160                 | 1,407                   | 0.82                                              |
| miR-31     | 8,921                 | 1,2526                  | 0.71                                              |
| miR-32     | 378                   | 623                     | 0.61                                              |

**Table W6. (continued)**

| miRNA      | Mean Signal Strength* |                         | ASML <sup>wt</sup> /ASML-CD44 <sup>kd</sup> Cells |
|------------|-----------------------|-------------------------|---------------------------------------------------|
|            | ASML <sup>wt</sup>    | ASML-CD44 <sup>kd</sup> |                                                   |
|            | Cells                 |                         |                                                   |
| miR-322    | 614                   | 453                     | 1.36                                              |
| miR-324-3p | 971                   | 1,041                   | 0.93                                              |
| miR-335    | 433                   | 531                     | 0.82                                              |
| miR-34a    | 597                   | 1,305                   | 0.46 <sup>†</sup>                                 |
| miR-34b    | 669                   | 355                     | 1.89                                              |
| miR-34c    | 720                   | 320                     | 2.25 <sup>†</sup>                                 |
| miR-361    | 414                   | 436                     | 0.95                                              |
| miR-365    | 1,493                 | 1,426                   | 1.05                                              |
| miR-374    | 539                   | 418                     | 1.29                                              |
| miR-425    | 386                   | 547                     | 0.71                                              |
| miR-429    | 2,625                 | 544                     | 4.83 <sup>†</sup>                                 |
| miR-466b-1 | 1,129                 | 1,481                   | 0.76                                              |
| miR-466b-2 | 1,296                 | 1,643                   | 0.79                                              |
| miR-466c   | 1,015                 | 1,430                   | 0.71                                              |
| miR-485    | 312                   | 579                     | 0.54                                              |
| miR-494    | 707                   | 417                     | 1.70                                              |
| miR-500    | 432                   | 457                     | 0.95                                              |
| miR-582    | 407                   | 92                      | 4.44 <sup>†</sup>                                 |
| miR-652    | 1,366                 | 1,756                   | 0.78                                              |
| miR-672    | 394                   | 1,063                   | 0.37 <sup>†</sup>                                 |
| miR-741-3p | 11                    | 857                     | 0.01 <sup>†</sup>                                 |
| miR-764    | 312                   | 647                     | 0.48 <sup>†</sup>                                 |
| miR-7a     | 1,850                 | 373                     | 4.96 <sup>†</sup>                                 |
| miR-872    | 692                   | 748                     | 0.92                                              |
| miR-883    | 7                     | 438                     | 0.02 <sup>†</sup>                                 |
| miR-9      | 486                   | 387                     | 1.25                                              |
| miR-93     | 1,936                 | 1,727                   | 1.12                                              |
| miR-96     | 5,737                 | 5,758                   | 1.00                                              |
| miR-98     | 1,139                 | 1,932                   | 0.59                                              |
| miR-99a    | 152                   | 4,253                   | 0.04 <sup>†</sup>                                 |
| miR-99b    | 528                   | 891                     | 0.59                                              |

\*All miRNAs (in alphabetic order) with a mean signal strength (quadruplicates, two independently performed microarray analyses) after normalization (Chipster analysis and Agilent annotation by Agilent Feature Extraction software) of >400 in ASML<sup>wt</sup> or ASML-CD44<sup>kd</sup> exosomes or cells are shown. <sup>†</sup>miRNA that differs between ASML<sup>wt</sup> versus ASML-CD44<sup>kd</sup> exosomes or cells in signal intensity by more than two-fold.

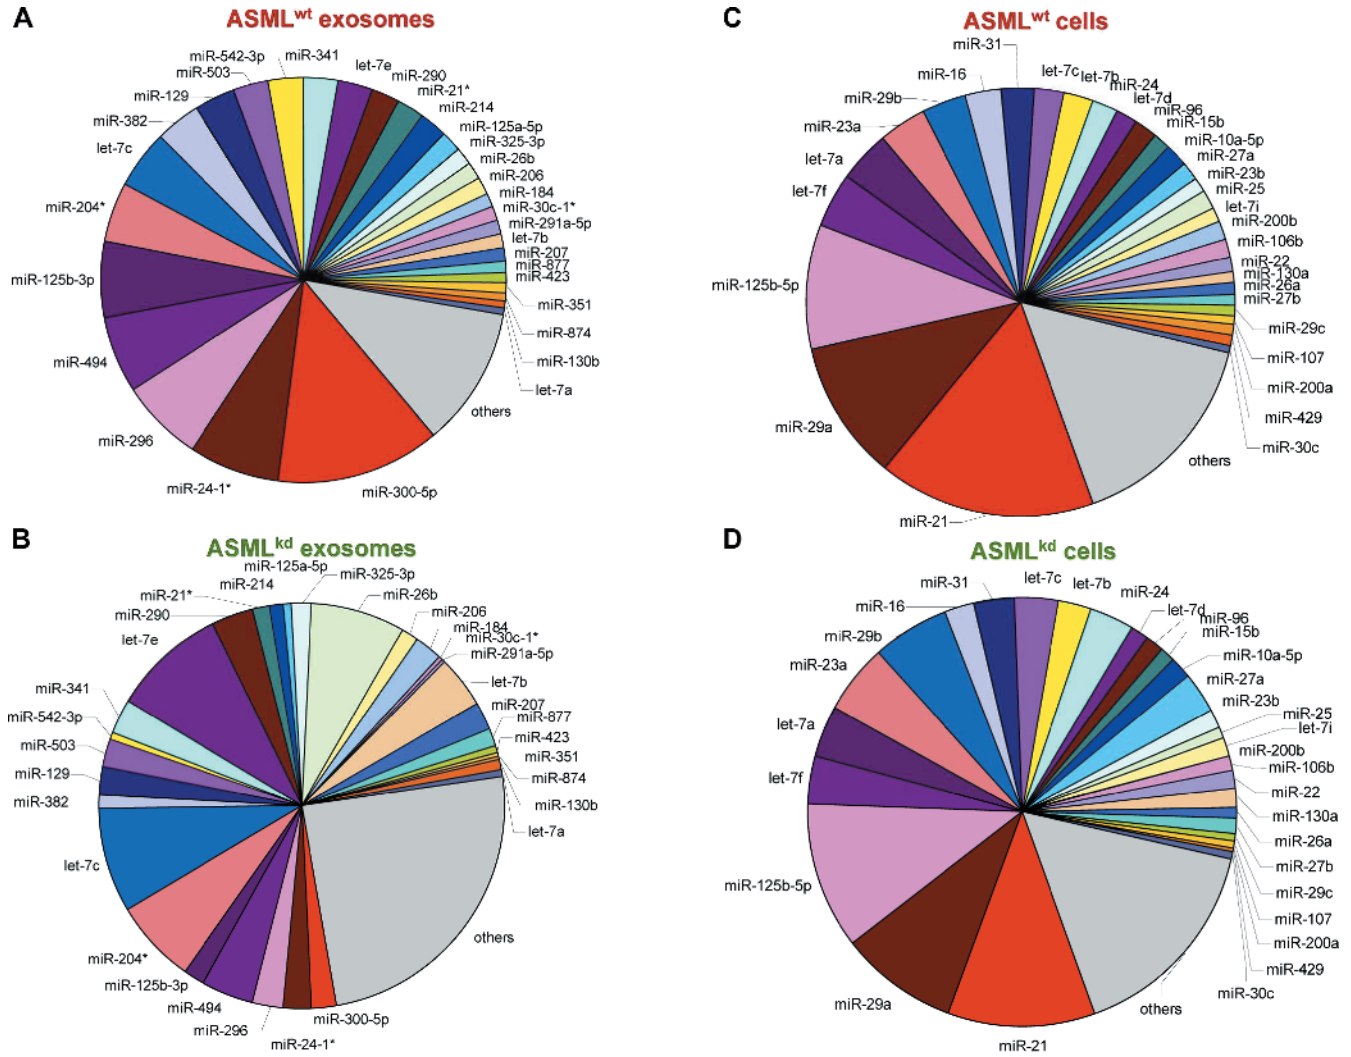

**Figure W4.** Comparative analysis of ASML<sup>wt</sup> and ASML-CD44<sup>kd</sup> cellular and exosomal miRNAs. (A–D) Presentation of the most abundant miRNA in ASML<sup>wt</sup> and, for comparison, in ASML-CD44<sup>kd</sup> cells and exosomes. The mean signal strength of quadruplicates of two independent microarray analyses is shown. ASML exosomes and cells contain a limited number of miRNA that differ significantly between cells and exosomes and in dependence on CD44v expression.

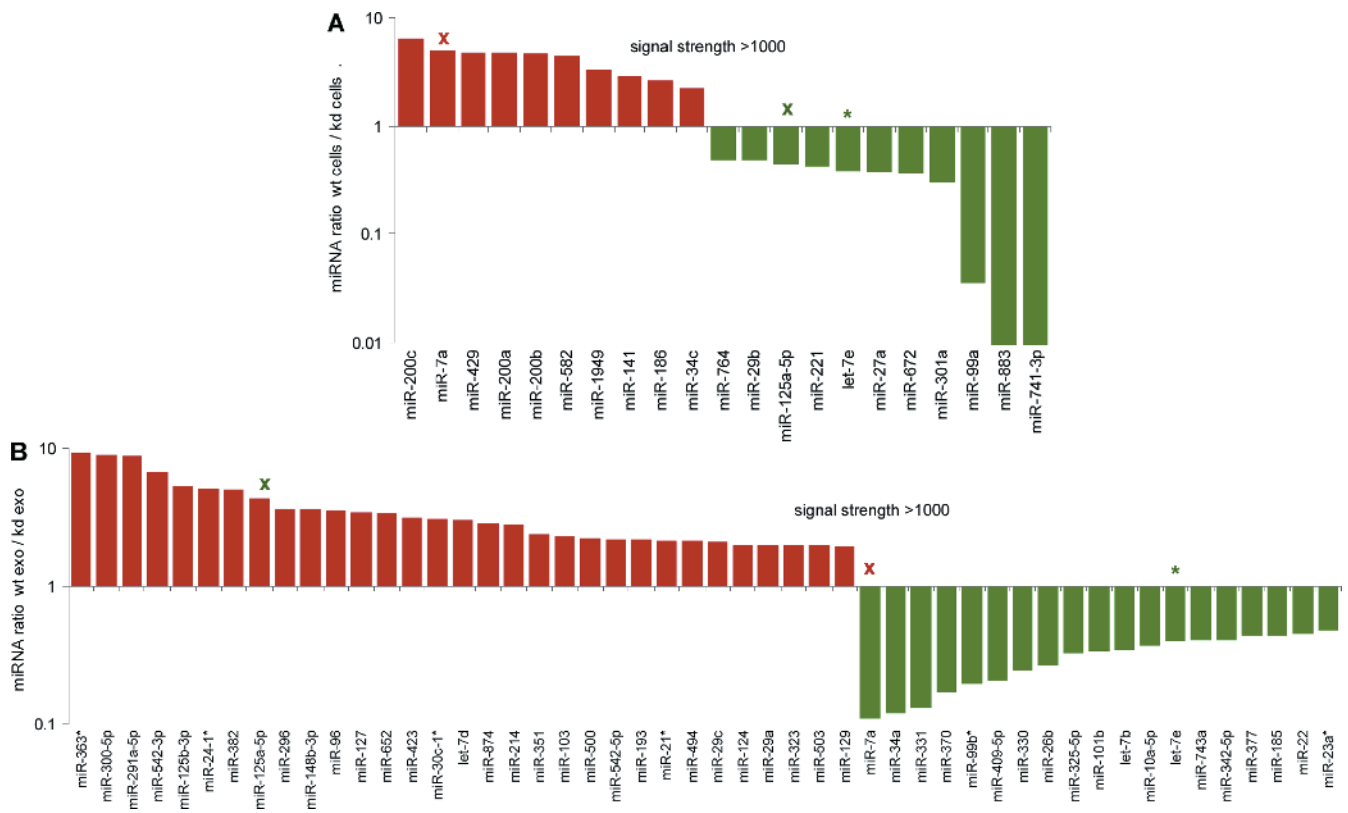

**Figure W5.** Comparison of miRNA in ASML<sup>wt</sup> versus ASML-CD44<sup>kd</sup> cells and exosomes. (A) Cellular and (B) exosomal miRNAs with a signal strength > 1000 and a more than two-fold difference in signal strength in ASML<sup>wt</sup> versus ASML-CD44<sup>kd</sup> cells or exosomes (mean signal strength of quadruplicates of two independent microarray analyses) is shown; Oppositely regulated miRNA in cells versus exosomes are indicated by X and aliquote regulated miRNA by asterisk. Independent of CD44v expression, most abundantly recovered cellular and exosomal miRNAs differ significantly, confirming the selectivity of miRNA recruitment.

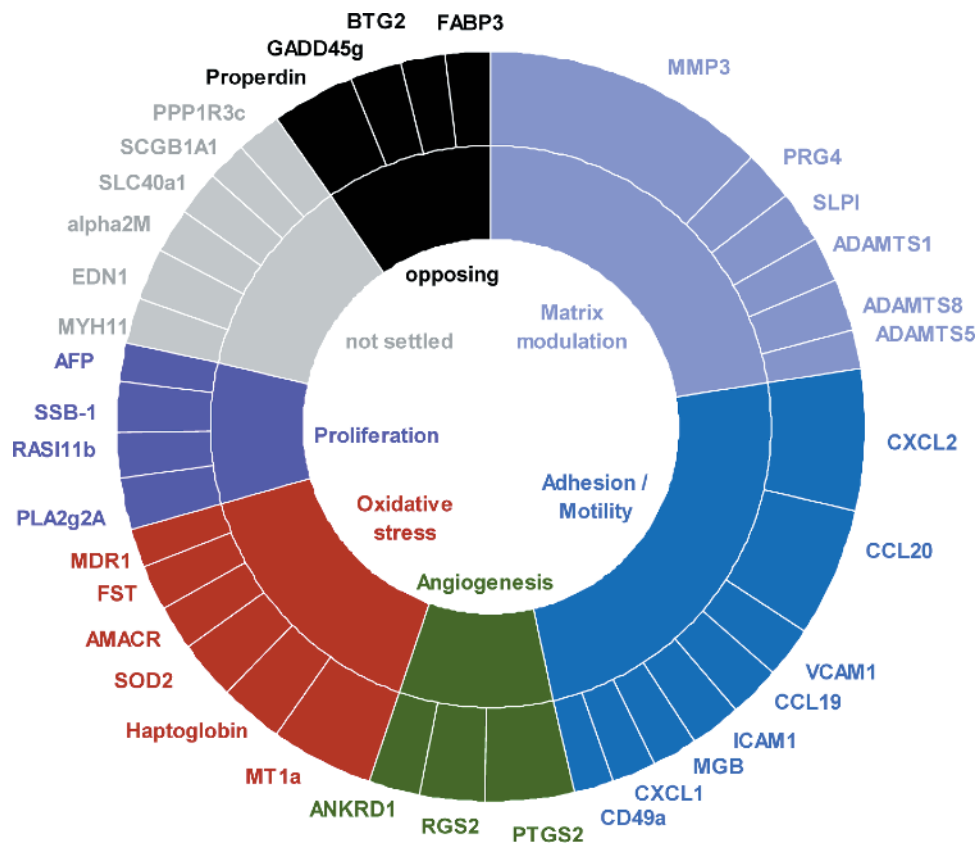

**Figure W6.** Exosome transfer-promoted activities of target cells in the premetastatic niche. Exosome uptake-induced upregulated mRNAs in LnStr were grouped according to main functional activities and are presented according to the fold up-regulation. Short comments on the main activity of upregulated genes and related references are given below.

#### Matrix modulation

MMP3 (matrix metalloproteinase 3): matrix degradation, well organized role in invasion and metastasis

Hua H, Li M, Luo T, Yin Y, and Jiang Y (2011). Matrix metalloproteinases in tumorigenesis: an evolving paradigm. *Cell Mol Life Sci* **68**, 3853–3868.

PRG4 (proteoglycan 4): co-receptor for integrins, co-operates with MT1-MMP in collagen modulation.

Vuoriluoto K, Högnäs G, Meller P, Lehti K, and Ivaska J (2011). Syndecan-1 and -4 differentially regulate oncogenic K-ras dependent cell invasion into collagen through  $\alpha 2\beta 1$  integrin and MT1-MMP. *Matrix Biol* **30**, 207–217.

SLPI (secretory leukocyte peptidase inhibitor): often upregulated in cancer, induces MMP9 transcription.

Nukiwa T, Suzuki T, Fukuhara T, and Kikuchi T (2008). Secretory leukocyte peptidase inhibitor and lung cancer. *Cancer Sci* **99**, 849–855.

Hoskins E, Rodriguez-Canales J, Hewitt SM, Elmasri W, Han J, Han S, Davidson B, and Kohn EC (2011). Paracrine SLPI secretion upregulates MMP-9 transcription and secretion in ovarian cancer cells. *Gynecol Oncol* **122**, 656–662.

ADAMTS1 (a disintegrin-like and metalloprotease with thrombospondin type 1, motif 1); ADAMTS8 (a disintegrin-like and metalloprotease with thrombospondin type 1, motif 8); ADAMTS5 (a disintegrin-like and metalloprotease with thrombospondin type 1, motif 5): procollagen maturation, extracellular matrix proteolysis related to angiogenesis and metastasis.

Apte SS (2009). A disintegrin-like and metalloprotease (reprolysin-type) with thrombospondin type 1 motif (ADAMTS) superfamily: functions and mechanisms. *J Biol Chem* **284**, 31493–31497.

#### Adhesion/motility

CXCL2 (C-X-C chemokine ligand 2), CCL20 (C-C chemokine ligand 20), CCL19 (C-C chemokine ligand 19), CXCL1 (CXC chemokine ligand 1): chemokines and their ligands largely determine organ specificity of metastases, facilitating migration and extravasation; they can be involved in tumor cell proliferation and survival.

Ben-Baruch A (2008). Organ selectivity in metastasis: regulation by chemokines and their receptors. *Clin Exp Metastasis* **25**, 345–356.

VCAM1 (vascular cell adhesion molecule 1); ICAM1 (intercellular adhesion molecule 1): metastasis promoting by engagement in migration, proliferation, angiogenesis, and thrombosis.

Mousa SA (2008). Cell adhesion molecules: potential therapeutic & diagnostic implications. *Mol Biotechnol* **38**, 33–40.

MGP (matrix Gla protein): migration promoting, overexpressed in cancer.

Mertsch S, Schurgers LJ, Weber K, Paulus W, and Senner V (2009). Matrix gla protein (MGP): an overexpressed and migration-promoting mesenchymal component in glioblastoma. *BMC Cancer* **9**, 302.

CD49a (integrin alpha 1): supports tumor cell migration.

Madsen CD and Sahai E (2010). Cancer dissemination—lessons from leukocytes. *Dev Cell* **19**, 13–26.

#### Angiogenesis

PTGS2/COX2 (prostaglandin-endoperoxide synthase 2): involved in inflammation, increased in more aggressive forms of colorectal cancer, known to promote angiogenesis.



---

Wang S, Liu Z, Wang L, and Zhang X (2009). NF-kappaB signaling pathway, inflammation and colorectal cancer. *Cell Mol Immunol* **6**, 327–334.

RGS2 (regulator of G-protein signaling 2): critical regulator of proangiogenic function of MDSC.

Boelte KC, Gordy LE, Joyce S, Thompson MA, Yang L, and Lin PC (2011). Rgs2 mediates pro-angiogenic function of myeloid derived suppressor cells in the tumor microenvironment via upregulation of MCP-1. *PLoS One* **6**, e18534.

ANKRD1 (ankyrin repeat domain 1): co-transcription factor involved in angiogenesis.

Samaras SE, Shi Y, and Davidson JM (2006). CARP: fishing for novel mechanisms of neovascularization. *J Invest Dermatol Symp Proc* **11**, 124–131.

#### **Oxidative stress**

MT1a (metallothionein): contributes to protective reactions with chemotherapeutic agents that are electrophiles or can generate reactive oxygen species.

Namdarghanbari M, Wobig W, Krezoski S, Tabatabai NM, and Petering DH (2011). Mammalian metallothionein in toxicology, cancer, and cancer chemotherapy. *J Biol Inorg Chem* **16**, 1087–1101.

Haptoglobin: CD163 clearance and metabolism of “free” hemoglobin released during intravascular hemolysis. This scavenging system counteracts the potentially harmful oxidative and NO-scavenging effects associated with “free” hemoglobin.

Nielsen MJ and Moestrup SK (2009). Receptor targeting of hemoglobin mediated by the haptoglobins: roles beyond heme scavenging. *Blood* **114**, 764–771.

SOD2 (superoxide dismutase 2): catalysis oxidative stress, upregulated in metastasis.

Hempel N, Carrico PM, and Melendez JA (2011). Manganese superoxide dismutase (Sod2) and redox-control of signaling events that drive metastasis. *Anticancer Agents Med Chem* **11**, 191–201.

AMACR ( $\alpha$ -methylacyl-CoA racemase): catalyzes the chiral inversion of a diverse number of 2-methyl acids (as their CoA esters) and regulates the entry of branched-chain lipids into the peroxisomal and mitochondrial  $\beta$ -oxidation pathways; linked with prostate, breast, colon, and other cancers.

Lloyd MD, Darley DJ, Wierzbicki AS, and Threadgill MD (2008). Alpha-methylacyl-CoA racemase—an ‘obscure’ metabolic enzyme takes centre stage. *FEBS J* **275**, 1089–1102.

FST (follistatin): Localization of FST to the nucleolus attenuates rRNA synthesis, a key process for cellular energy homeostasis and cell survival. Overexpression of FST delays glucose deprivation-induced apoptosis and promotes survival.

Gao X, Wei S, Lai K, Sheng J, Su J, Zhu J, Dong H, Hu H, and Xu Z (2010). Nucleolar follistatin promotes cancer cell survival under glucose-deprived conditions through inhibiting cellular rRNA synthesis. *J Biol Chem* **285**, 36857–36864.

MDR1 (ATP-binding cassette, subfamily B, member 1): promotes drug resistance, high expression frequently associated with metastasizing cancer-initiating cells.

Adhikari AS, Agarwal N, and Iwakuma T (2011). Metastatic potential of tumor-initiating cells in solid tumors. *Front Biosci* **16**, 1927–1938.

#### **Proliferation**

PLA2g2A (phospholipase A2, group 2A): contributes to EGFR activation.

Hernández M, Martín R, García-Cubillas MD, Maeso-Hernández P, and Nieto ML (2010). Secreted PLA2 induces proliferation in astrocytoma through the EGF receptor: another inflammation-cancer link. *Neuro Oncol* **12**, 1014–1023.

RASL11b (RAS-like family 11 member B): RasL11b acts in concert with UBF to facilitate initiation and/or elongation by RNA polymerase II, suggested to be upregulated in cancer.

Stolle K, Schnoor M, Fuellen G, Spitzer M, Cullen P, and Lorkowski S (2010). Cloning, genomic organization, and tissue-specific expression of the RASL11B gene. *Biochim Biophys Acta* **1769**, 514–524.

Pistoni M, Verrecchia A, Doni M, Guccione E, and Amati B (2010). Chromatin association and regulation of rDNA transcription by the Ras-family protein RasL11a. *EMBO J* **29**, 1215–1224.

SSB1 (similar to SPRY domain-containing SOCS box protein): binds to MET and enhances the HGF-induced Erk–Elk-1–SRE pathway.

Wang D, Li Z, Messing EM, and Wu G (2005). The SPRY domain-containing SOCS box protein 1 (SSB-1) interacts with MET and enhances the hepatocyte growth factor-induced Erk–Elk-1–serum response element pathway. *J Biol Chem* **280**, 16393–16401.

AFP (alpha-fetoprotein): tumor growth enhancing, possesses proangiogenic properties.

Mizejewski GJ (2007). Physiology of alpha-fetoprotein as a biomarker for perinatal distress: relevance to adverse pregnancy outcome. *Exp Biol Med* **232**, 993–1004.

#### **Not settled**

MYH11 (myosin heavy chain 11): not settled, known to fuse with CBF in leukemia.

Weckerle AB, Santra M, Ng MC, Koty PP, and Wang YH (2011). *CBFB* and *MYH11* in inv(16)(p13q22) of acute myeloid leukemia displaying close spatial proximity in interphase nuclei of human hematopoietic stem cells. *Genes Chromosomes Cancer* **50**, 746–755.

EDN1 (endothelin 1): not settled, peptide hormone signaling through its cognate receptor, the endothelin-A receptor, critical for patterning, relation to cancer unknown.

Clouthier DE, Garcia E, and Schilling TF (2010). Regulation of facial morphogenesis by endothelin signaling: insights from mice and fish. *Am J Med Genet A* **152A**, 2962–2973.

$\alpha$ 2M (alpha-2-macroglobulin): interacts and captures virtually any proteinase.

Woessner JF Jr (1991). Matrix metalloproteinases and their inhibitors in connective tissue remodeling. *FASEB J* **5**, 2145–2154.

SLC40a1 (solute carrier family 39 iron-regulated transporter, member 1): iron export, may inhibit metastasis.

Jiang XP, Elliott RL, and Head JF (2010). Manipulation of iron transporter genes results in the suppression of human and mouse mammary adenocarcinomas. *Anticancer Res* **30**, 759–765.

SCGB1A1 (secretoglobin, family 1A, member 1): downstream target for a homeodomain transcription factor NKX2-1, which is critical for the development of lung, thyroid, and ventral forebrain, upregulated in lung cancer.

Kurotani R, Kumaki N, Naizhen X, Ward JM, Linnoila RI, and Kimura S (2011). Secretoglobin 3A2/uteroglobin-related protein 1 is a novel marker for pulmonary carcinoma in mice and humans. *Lung Cancer* **71**, 42–48.



---

PPP1R3C (protein phosphatase 1, regulatory (inhibitor) subunit 3C): correlates with glycogen accumulation under hypoxia, described as a candidate tumor suppressor.

Shen GM, Zhang FL, Liu XL, and Zhang JW (2010). Hypoxia-inducible factor 1-mediated regulation of PPP1R3C promotes glycogen accumulation in human MCF-7 cells under hypoxia. *FEBS Lett* **584**, 4366–4372.

Bonazzi VF, Irwin D, and Hayward NK (2009). Identification of candidate tumor suppressor genes inactivated by promoter methylation in melanoma. *Genes Chromosomes Cancer* **48**, 10–21.

#### **Metastasis opposing**

Properdin: antiangiogenic.

Kemper C, Atkinson JP, and Hourcade DE (2010). Properdin: emerging roles of a pattern-recognition molecule. *Annu Rev Immunol* **28**, 131–155.

GADD45g (growth arrest and DNA-damage-inducible 45γ): supposed to function as metastasis inhibitor.

Ying J, Srivastava G, Hsieh WS, Gao Z, Murray P, Liao SK, Ambinder R, and Tao Q (2005). The stress-responsive gene GADD45G is a functional tumor suppressor, with its response to environmental stresses frequently disrupted epigenetically in multiple tumors. *Clin Cancer Res* **11**, 6442–6449.

BTG2 (B-cell translocation gene 2): antiproliferative, pan cell cycle modulator and endogenous cell death molecule, downregulated in cancer.

Lim IK (2006). TIS21 (/BTG2/PC3) as a link between ageing and cancer: cell cycle regulator and endogenous cell death molecule. *J Cancer Res Clin Oncol* **132**, 417–426.

FABP3 (fatty acid binding protein 3): inhibits proliferation and promotes apoptosis

Zhu C, Hu DL, Liu YQ, Zhang QJ, Chen FK, Kong XQ, Cao KJ, Zhang JS, and Qian LM (2011). Fabp3 inhibits proliferation and promotes apoptosis of embryonic myocardial cells. *Cell Biochem Biophys* **60**, 259–266.

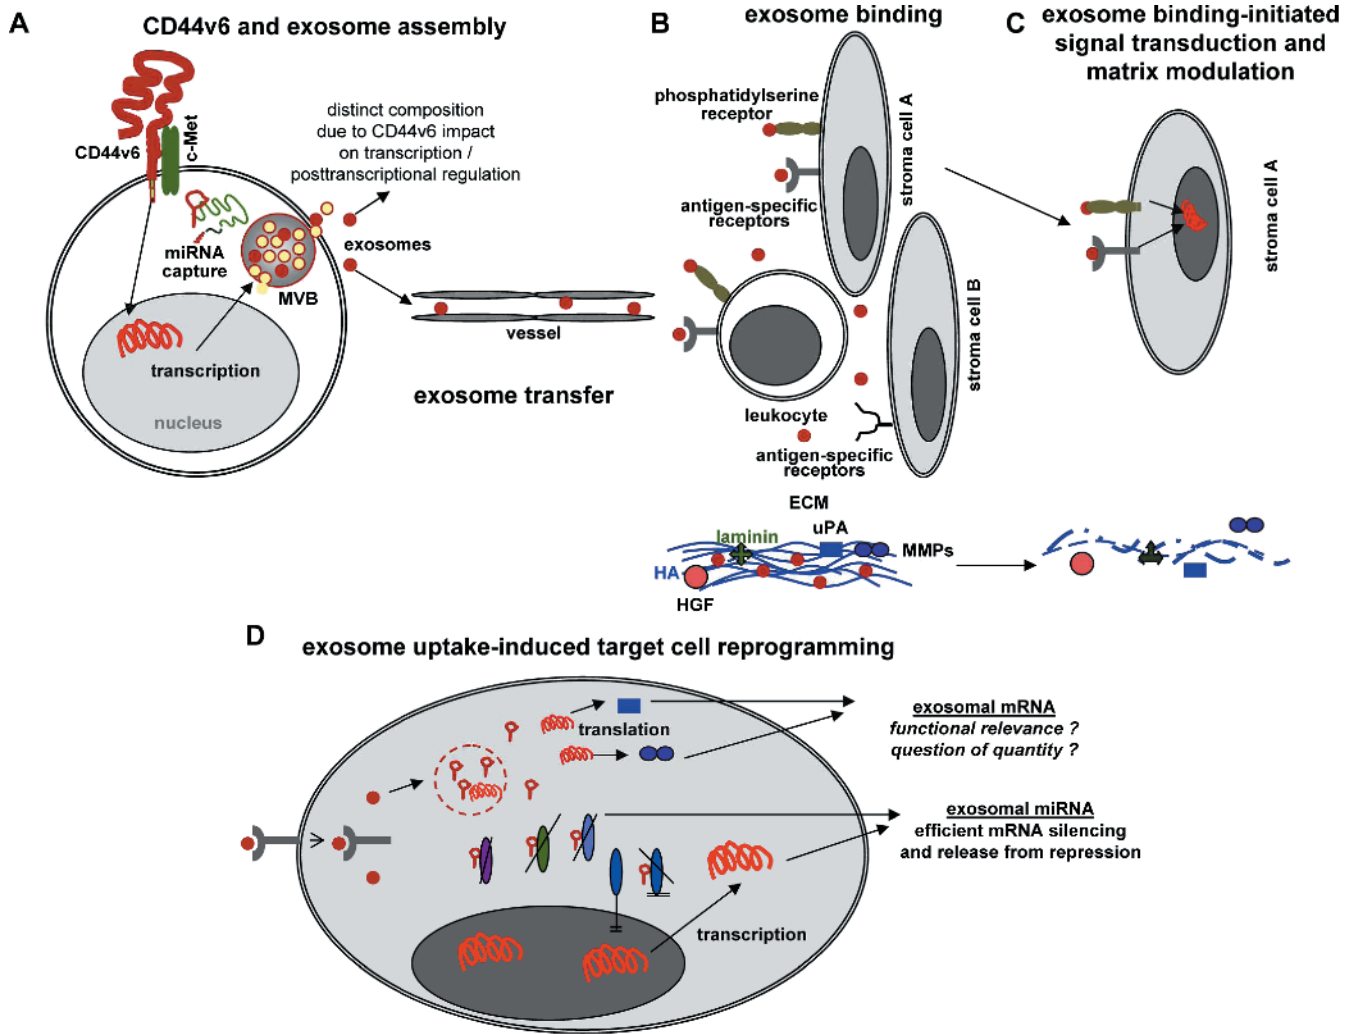

**Figure W7.** A metastasis-associated gene, its impact on exosome shaping, and the impact on host cells: (A) CD44v6 influences gene transcription and posttranscriptional modulation. This influences the protein [1,2], mRNA, and miRNA composition of exosomes. Exosomes reach premetastatic organs from a distantly located primary tumor (demonstrated for draining lymph nodes, accounts equally for other metastatic organs and the bone marrow, as well as for transfer through the blood [2,3]). (B) Exosomes bind selected target cells (demonstrated for LnStr and LuFb, additional preferred targets for ASML exosomes are monocytes/monocyte progenitors [3]). (C) Exosome binding is supposed to initiate signal transduction in target cells [4] (not approached in the present manuscript) and severely affect the host matrix (unpublished). (D) Exosomes are taken up and uptaken mRNA and miRNA are recovered in the target cell. According to our findings, uptaken miRNA severely modulates the target cell, fitting the demands for premetastatic niche formation (only demonstrated for metastatic organ stroma cells but accounts equally well for hematopoietic cells).

Taken that tumor exosomes are recovered in patients' sera [5] and exhibit very selective binding implies that functional activity of exosomes has to be taken into account at sites distant from the tumor (e.g., premetastatic organs), where the selectivity of exosome uptake will greatly facilitate therapeutic interference. However and notably, as the exosome composition becomes significantly influenced also by proteins of the tumor cell that are not engaged in exosome assembly or transport, it is essential to characterize the individual patient's exosomes in advance, which can be approached by tumor exosomes in the patient's serum.

[1] Jung T, Castellana D, Klingbeil P, Cuesta Hernández I, Vitacolonna M, Orlicky DJ, Roffler SR, Brodt P, and Zöller M (2009). CD44v6 dependence of premetastatic niche preparation by exosomes. *Neoplasia* **11**, 1093–1105.

[2] Zech D, Rana S, Büchler MW, and Zöller M (2012). Tumor-exosomes and leukocyte activation: an ambivalent crosstalk. *Cell Commun Signal* **10**, 37.

[3] Rana S, Shijing Y, Stadel D, and Zöller M (2012). Toward tailored exosomes: The exosomal tetraspanin web contributes to target cell selection. *Int J Biochem Cell Biol* **44**, 1574–1584.

[4] Hupalowska A and Miaczynska M (2012). The new faces of endocytosis in signaling. *Traffic* **13**, 9–18.

[5] Wittmann J and Jäck HM (2010). Serum microRNAs as powerful cancer biomarkers. *Biochim Biophys Acta* **1806**, 200–207.
